# Supplementary material for: Lactiplantibacillus plantarum AR113 Exhibit Accelerated Liver Regeneration by Regulating Gut Microbiota and Plasma Glycerophospholipid
Source: PubMed Central journal article supplement (PMC8834300; doi:10.3389/fmicb.2021.800470), 2022-01-13
Supplement: Image_1.pdf [file Image_1.pdf]

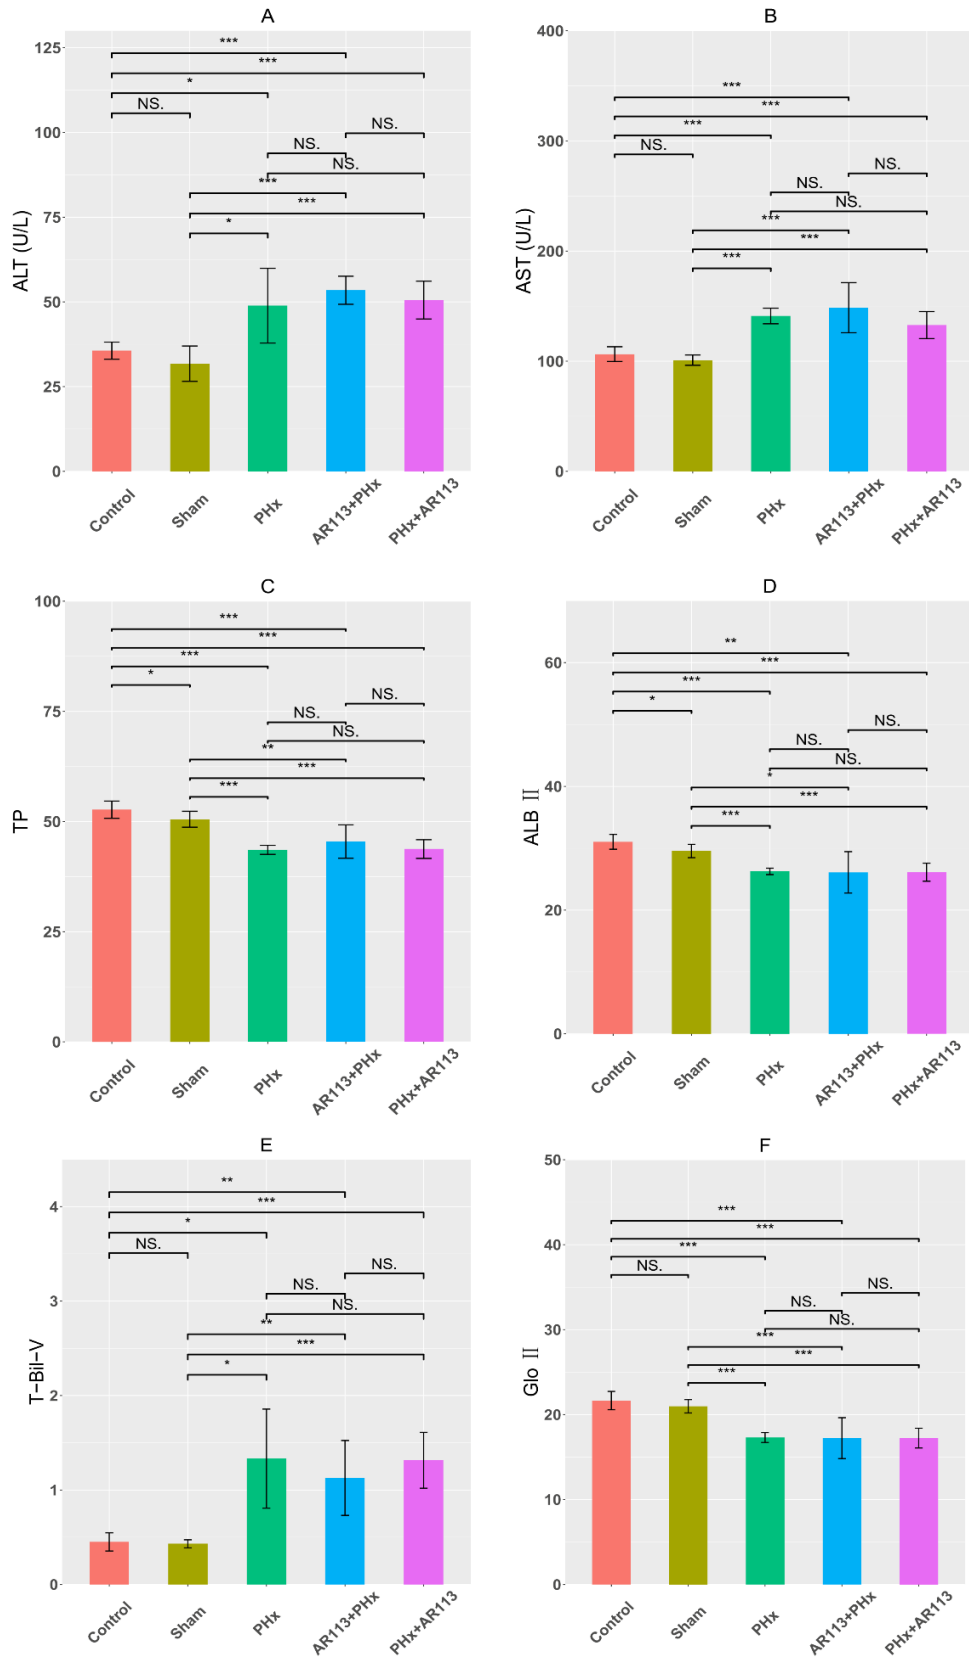

Fig. S1. Liver function at 3 days after PHx among the Control, Sham, PHx, AR113+PHx and PHx+AR113 groups. \*p<0.05, \*\*p<0.01, \*\*\*p<0.001, ns=not significant as determined by t-test.

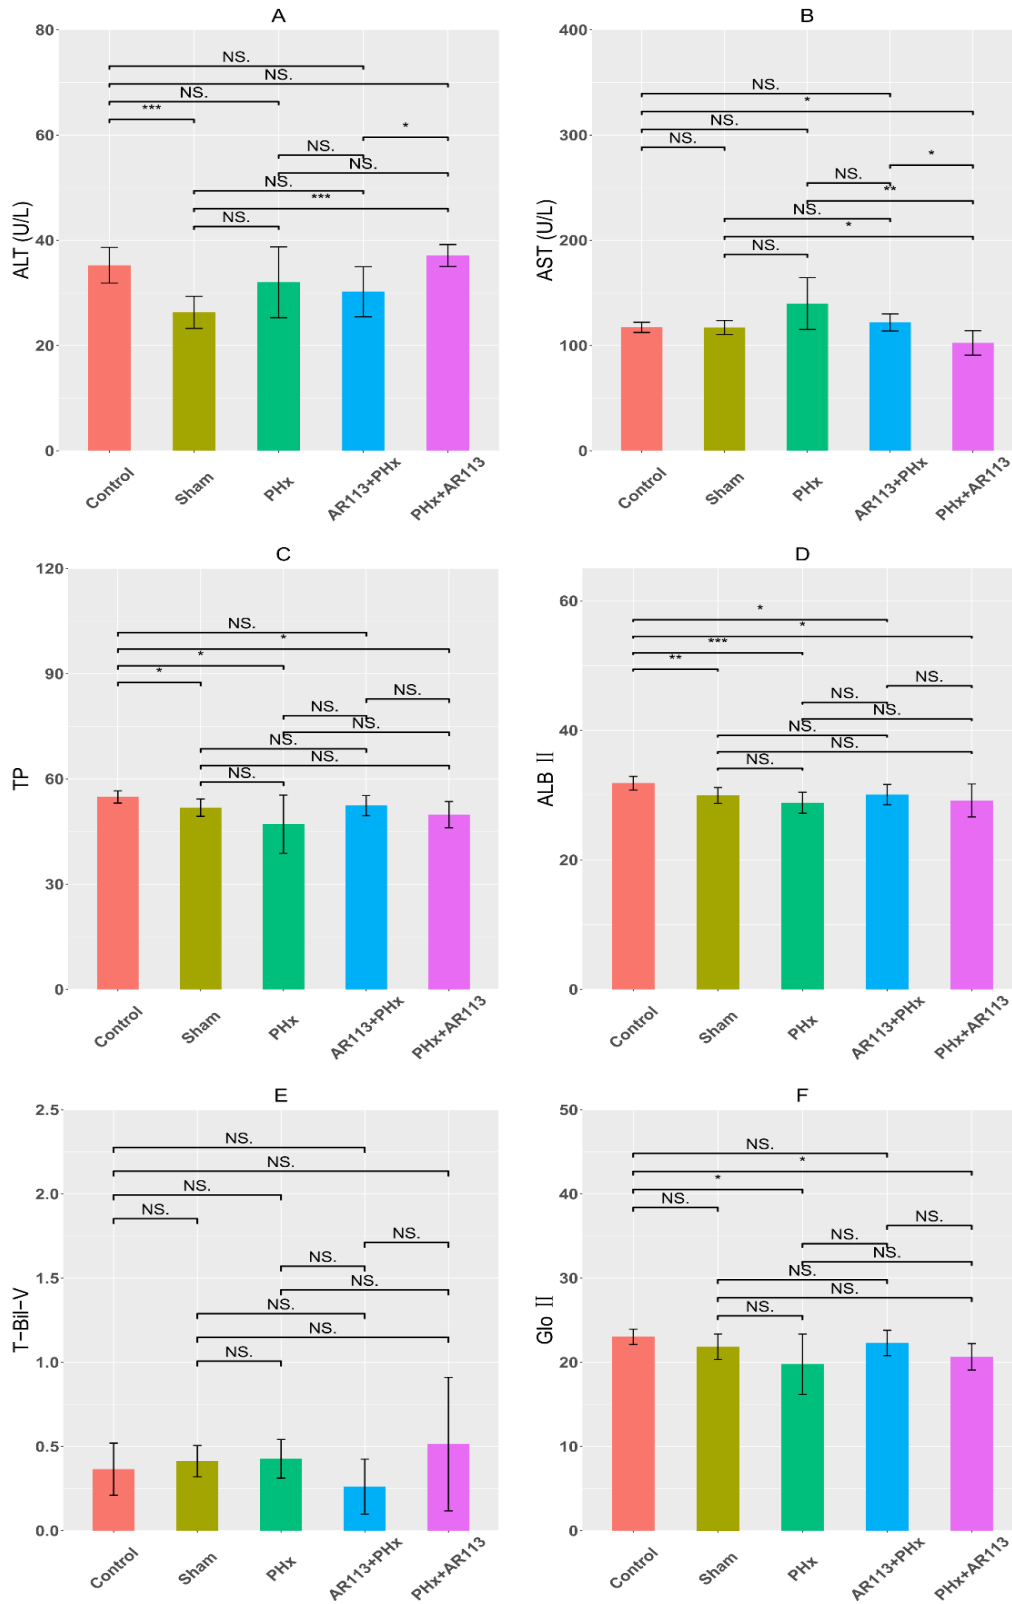

Fig. S2. Liver function at the 7 days after PHx among the Control, Sham, PHx, AR113+PHx and PHx+AR113 groups. \* $p < 0.05$ , \*\* $p < 0.01$ , \*\*\* $p < 0.001$ , ns=not significant as determined by t-test.

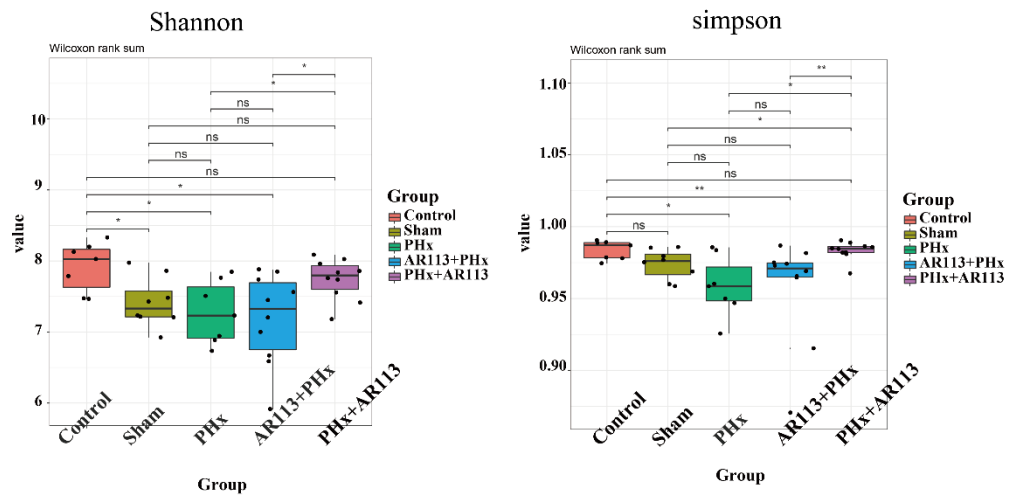

Fig. S3. Comparison of microbial alpha diversity at 3 days after PHx among the control, Sham, PHx, AR113+PHx and PHx+AR113 groups. (A) Shannon index of Diversity; (B) Simpson index of Diversity. \* $p < 0.05$ , \*\* $p < 0.01$ , ns=not significant as determined by t-test.

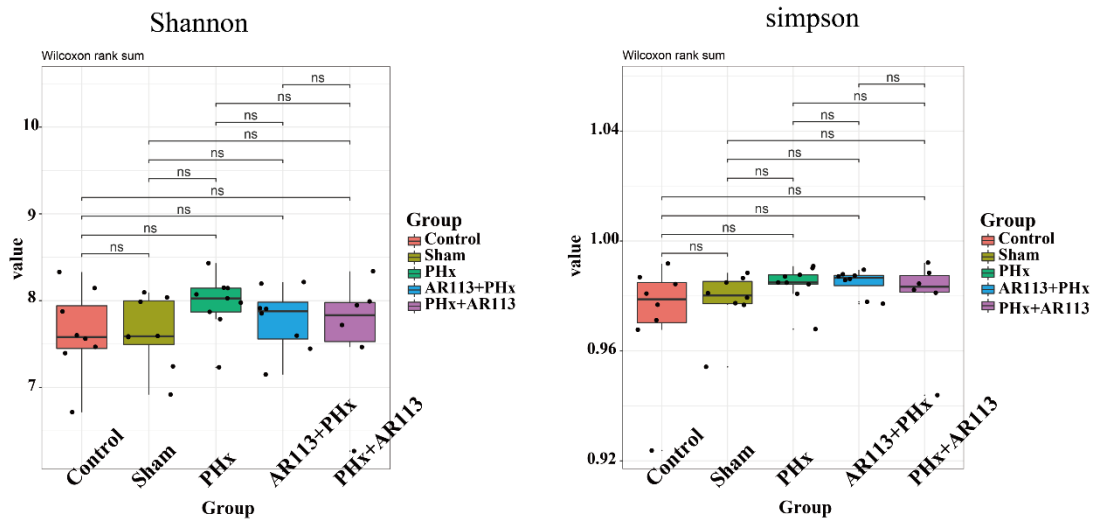

Fig. S4. Comparison of microbial alpha diversity at 7 days after PHx among the control, Sham, PHx, AR113+PHx and PHx+AR113 groups. (A) Shannon index of Diversity; (B) Simpson index of Diversity. ns=not significant as determined by t-test.

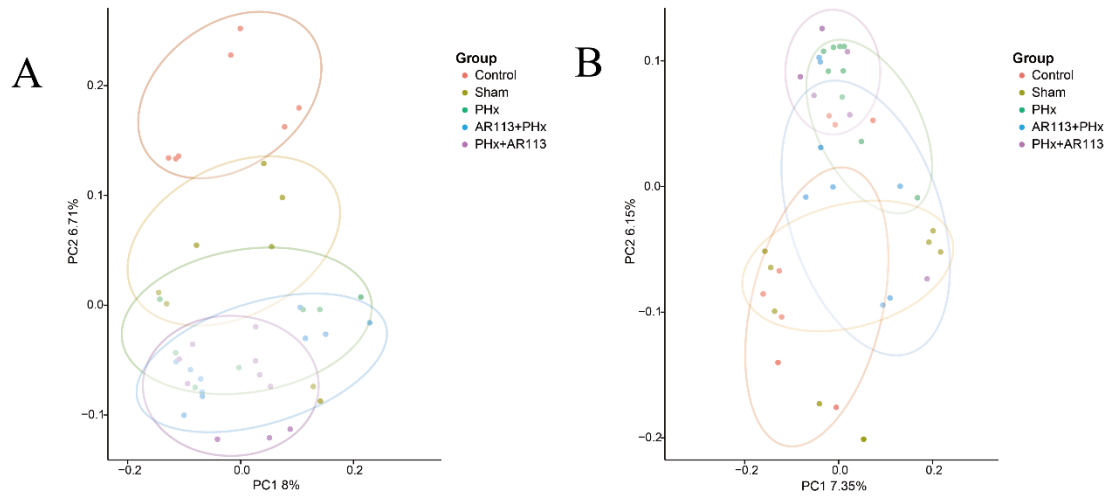

Fig. S5. Principal Coordinates Analysis (PCoA) plot of taxon abundance based on weighted unifracs distance. (A) 3 days after PHx. (B) 7 days after PHx.
