# Supplementary material for: Lactiplantibacillus plantarum AR113 Exhibit Accelerated Liver Regeneration by Regulating Gut Microbiota and Plasma Glycerophospholipid
Source: Front Microbiol. 2022 Jan 13;12:800470. doi: 10.3389/fmicb.2021.800470 (PMC8834300; doi:10.3389/fmicb.2021.800470)
Supplement: Supplementary file 7 [file Table_7.XLSX]

## Sheet: Group-JSH3_Group-ZL3
Metabolites	log2(FC)	KEGG	RED/BLUE	ID Annotation	Annotation	ID	m/z	Retention time (min)	Ion mode	Compound ID	Super Class	Class	Sub Class	Adducts	Formula	Score	Fragmentation Score	Mass Error (ppm)	VIP	P-value	adj.P-value	FC	average(Group-JSH3)	average(Group-ZL3)	JSH3-1	JSH3-2	JSH3-3	JSH3-4	JSH3-5	JSH3-6	JSH3-7	JSH3-8	ZL3-1	ZL3-2	ZL3-3	ZL3-4	ZL3-5	ZL3-6	ZL3-7	ZL3-8	ZL3-9	ZL3-10	ZL3-11
Pranlukast	0.729413					15.54_520.1363m/z	520.136	15.5376	pos	HMDB0015481	Organoheterocyclic compounds	Benzopyrans	1-benzopyrans	M+K	C27H23N5O4	32.9	0	-3.81444	1.52729	2.81176e-07	5.74742e-05	1.65796	573.336	345.807	529.806	489.685	442.172	657.667	616.254	641.092	581.449	628.563	383.315	389.82	297.22	349.89	345.97	376.063	295.166	333.698	411.218	345.864	275.656
2,3-Dihydro-6-methoxy-2,2-dimethyl-4H-1-benzopyran-4-one	0.65686					8.29_251.0925m/z	251.092	8.29262	neg	HMDB0041410	Organoheterocyclic compounds	Benzopyrans	1-benzopyrans	M+FA-H	C12H14O3	47.1	37.9	-0.183381	1.1449	0.000482756	0.00841335	1.57665	431.139	273.453	379.49	554.236	440.78	374.455	413.195	405.018	449.487	432.453	385.67	465.434	233.632	360.896	214.442	242.665	180.055	271.366	250.554	219.393	183.879
Emtricitabine	1.1986	C12599	red			5.11_228.0252m/z	228.025	5.11465	neg	HMDB0015017	Nucleosides, nucleotides, and analogues	Nucleoside and nucleotide analogues	3'-thia pyrimidine nucleosides	M-H2O-H	C8H10FN3O3S	42.2	17.6	1.55576	1.62433	0.0292321	0.0982276	2.29517	734.38	319.968	536.287	338.372	398.409	626.513	789.919	514.318	651.181	2020.04	286.099	331.553	77.9943	479.56	538.881	664.443	204.13	420.12	259.721	104.114	153.031
1-Cyano-2-hydroxy-3-butene	0.498927					0.75_80.0492m/z	80.0492	0.7467	pos	HMDB0031339	Organic oxygen compounds	Organooxygen compounds	Alcohols and polyols	M+H-H2O	C5H7NO	42	15.6	-2.85055	1.04827	0.00629134	0.0387904	1.41316	553.807	391.892	394.229	476.389	433.856	608.003	675.61	603.745	604.566	634.053	506.288	610.554	286.824	472.661	298.798	323.263	266.952	431.952	480.635	384.316	248.567
Trifluoroacetic acid	0.869517					17.24_112.9854m/z	112.985	17.2399	neg	HMDB0014118	Organic acids and derivatives	Carboxylic acids and derivatives	Alpha-halocarboxylic acids and derivatives	M-H	C2HF3O2	53.3	70.1	-1.39367	1.0339	2.26365e-05	0.00112809	1.82705	252.491	138.196	264.227	342.754	298.445	254.028	175.155	204.508	280.186	200.625	167.193	202.73	117.982	170.684	118.326	125.012	126.848	139.832	127.476	119.129	104.942
Sphinganine	-0.891244	C00836	blue	rno00600|rno04071	Sphingolipid metabolism|Sphingolipid signaling pathway	10.23_302.3040m/z	302.304	10.2256	pos	395	Organic nitrogen compounds	Organonitrogen compounds	Amines	M+H	C18H39NO2	50.7	61.3	-4.49735	1.15048	0.000190576	0.00475849	0.539149	172.571	320.08	176.683	156.823	214.927	220.884	176.286	172.01	89.9412	173.013	216.998	227.163	421.198	352.05	242.702	261.786	350.194	318.614	281.354	447.205	401.614
Timolol	0.939436	C07141	red			3.60_631.3061m/z	631.306	3.60458	neg	HMDB0014517	Organic nitrogen compounds	Organonitrogen compounds	Amines	2M-H	C13H24N4O3S	40.8	14.5	-0.707635	3.84907	0.00294928	0.0252882	1.91778	4015.19	2093.67	2706.96	2871.42	2368.56	5062.47	2292.07	4432.88	6226.87	6160.28	1671.25	1794.52	3277.59	2834.69	1448.62	1992	2239.97	1414.01	1971.11	1309.56	3077.01
Betaine	-0.731636	C00719	blue	rno02010|rno00260	ABC transporters|Glycine, serine and threonine metabolism	0.69_117.0788n	118.086	0.687867	pos	287	Organic acids and derivatives	Carboxylic acids and derivatives	Amino acids, peptides, and analogues	M+H, M+Na, 2M+H, 2M+Na	C5H11NO2	56.2	83.3	-1.45123	3.75565	5.65572e-05	0.00207319	0.602221	2364.36	3926.07	2566.11	2016.09	2566	2289.93	2391.95	1997.13	2046.8	3040.9	4530.88	5368.22	4491.51	4279.53	3934.11	3127.95	3437.36	3813.21	3407.43	4198.57	2598.02
Oxidized glutathione	-1.2071	C00127	blue	rno04918|rno04216|rno00480	Thyroid hormone synthesis|Ferroptosis|Glutathione metabolism	1.21_611.1447m/z	611.145	1.21457	neg	HMDB0003337	Organic acids and derivatives	Carboxylic acids and derivatives	Amino acids, peptides, and analogues	M-H	C20H32N6O12S2	49.2	51.3	0.0514725	1.8733	0.0049112	0.033658	0.433139	389.634	899.557	640.211	736.752	802.871	94.259	294.487	117.026	167.358	264.104	1133.37	1394.57	675.213	591.714	465.493	445.699	952.537	566.164	1041.25	1150.35	1478.77
Thyrotropin releasing hormone	0.611914	C03958	red	rno04080	Neuroactive ligand-receptor interaction	9.18_362.1695n	407.168	9.1794	neg	HMDB0060080	Organic acids and derivatives	Carboxylic acids and derivatives	Amino acids, peptides, and analogues	M-H, M+FA-H	C16H22N6O4	42.2	15	-2.00996	1.26234	0.0045414	0.0321084	1.52829	600.835	393.143	747.609	366.263	467.468	531.257	536.034	510.307	793.065	854.679	553.869	537.233	361.487	479.582	415.827	393.973	317.778	412.39	356.847	245.139	250.449
Neurotensin 11-13	1.83452					10.81_406.2348m/z	406.235	10.8116	neg	HMDB0013024	Organic acids and derivatives	Carboxylic acids and derivatives	Amino acids, peptides, and analogues	M-H	C21H33N3O5	40.8	13.3	0.153308	1.7366	0.0172013	0.0701074	3.56652	628.43	176.203	480.858	173.943	189.33	617.684	808.643	458.629	439.34	1859.02	242.785	95.637	43.0162	154.787	181.895	451.381	135.787	513.855	72.2747	18.3183	28.4937
L-Oxalylalbizziine	0.331041					2.46_200.0306m/z	200.031	2.45765	neg	HMDB0039164	Organic acids and derivatives	Carboxylic acids and derivatives	Amino acids, peptides, and analogues	M-H2O-H	C6H9N3O6	48.4	47.6	-3.13007	1.67918	0.0325363	0.105623	1.25792	2437.62	1937.82	2176.06	2583.46	2221.57	2144.55	2592.81	2287.86	2842.86	2651.8	2777.54	3077.73	1731.95	2377.21	1581.44	1539.4	1450.87	1496.71	1974.07	1781.41	1527.66
N-Palmitoyl tyrosine	-2.10917					7.99_419.3029n	464.301	7.99215	neg	HMDB0062340	Organic acids and derivatives	Carboxylic acids and derivatives	Amino acids, peptides, and analogues	M+FA-H, 2M-H	C25H41NO4	40.2	4.36	-1.46078	6.68842	0.00620464	0.0384127	0.231781	1850.01	7981.73	1226.47	1114.23	374.928	4847.07	580.154	776.798	1669	4211.44	8491.71	6532.94	20987.3	13943.1	2355.26	3877.82	3974.54	8816.65	5564.09	5776.36	7479.28
Vignatic acid A	1.52077					11.69_552.2711m/z	552.271	11.6894	neg	HMDB0033599	Organic acids and derivatives	Carboxylic acids and derivatives	Amino acids, peptides, and analogues	M-H	C30H39N3O7	38.1	3.51	-0.837291	2.09115	2.68514e-06	0.00029024	2.86944	667.233	232.531	823.164	629.561	853.685	577.115	579.506	509.23	578.337	787.263	178.734	185.672	194.042	413.05	323.546	379.496	242.974	434.38	88.2498	55.71	61.9812
Prolyl-Hydroxyproline	0.661043					3.63_474.2552m/z	474.255	3.62578	pos	HMDB0029018	Organic acids and derivatives	Carboxylic acids and derivatives	Amino acids, peptides, and analogues	2M+NH4	C10H16N2O4	41.3	9.39	-1.31073	1.25891	0.0265242	0.0921848	1.58122	770.272	487.136	562.326	661.043	513.409	1508.15	669.409	969.219	581.534	697.088	344.275	381.193	723.695	434.374	405.621	518.133	585.465	372.802	513.433	234.324	845.184
L-alpha-glutamyl-L-hydroxyproline	0.446913					8.51_261.1091m/z	261.109	8.50938	pos	HMDB0011161	Organic acids and derivatives	Carboxylic acids and derivatives	Amino acids, peptides, and analogues	M+H	C10H16N2O6	39.7	5.19	3.71255	1.16703	0.0162838	0.067776	1.36312	820.473	601.908	652.871	830.689	737.187	841.032	915.501	871.829	825.74	888.934	833.182	997.98	387.081	845.809	425.376	524.341	405.172	674.185	642.673	560.202	324.986
S-(11-hydroxy-9-deoxy-delta12-PGD2)-glutathione	-0.931999					8.75_628.3239m/z	628.324	8.7512	pos	HMDB0013055	Organic acids and derivatives	Carboxylic acids and derivatives	Amino acids, peptides, and analogues	M+H-H2O	C30H51N3O10S	48.1	53.9	-3.66507	1.13966	0.0391588	0.118986	0.524131	262.752	501.31	203.84	315.426	300.328	103.416	344.333	709.252	83.0766	42.3458	584.515	238.778	299.307	243.513	733.811	496.301	930.629	497.453	448.764	796.71	244.628
Threoninyl-Threonine	1.37414					1.53_220.1070n	201.089	1.52653	neg	HMDB0029071	Organic acids and derivatives	Carboxylic acids and derivatives	Amino acids, peptides, and analogues	M-H2O-H, M-H	C8H16N2O5	42.8	29.6	4.92996	1.01593	0.0140948	0.0624391	2.59213	251.092	96.8668	213.541	99.7285	187.275	298.332	306.384	170.118	143.169	590.186	72.3956	31.5205	44.6516	66.6651	139.229	190.513	86.4446	327.043	40.7613	34.9665	31.3453
Desethylchloroquine	-2.90792					7.02_581.2951m/z	581.295	7.0202	neg	HMDB0041870	Organoheterocyclic compounds	Quinolines and derivatives	Aminoquinolines and derivatives	2M-H	C16H22ClN3	38.6	2.9	3.2899	1.44357	0.0105147	0.052443	0.133238	48.0218	360.421	138.128	99.4135	77.2001	18.3134	16.4274	20.0853	11.2567	3.35006	43.6307	173.407	490.024	68.6873	781.841	48.9059	554.793	18.1365	548.716	421.869	814.625
Terbutaline	-1.92156	C07129	blue			12.41_468.3057m/z	468.306	12.406	pos	HMDB0015009	Benzenoids	Phenols	Benzenediols	2M+NH4	C12H19NO3	36.9	1.79	-2.41789	1.21361	0.000334213	0.00674014	0.263968	62.0865	235.204	134.623	69.5443	70.1865	61.883	34.4655	52.7327	44.2589	28.9983	83.7161	133.668	247.143	172.516	182.45	198.176	387.876	173.132	308.14	420.395	280.037
N-Undecylbenzenesulfonic acid	0.803702					11.26_311.1681m/z	311.168	11.2611	neg	HMDB0032549	Benzenoids	Benzene and substituted derivatives	Benzenesulfonic acids and derivatives	M-H	C17H28O3S	41.3	18.1	-1.79472	2.15191	0.00118695	0.0150205	1.74557	1523.92	873.018	920.288	1004.47	1124.53	2085.31	2346.96	1552.79	1699.39	1457.6	889.366	1239.87	1071.49	857.32	700.384	663.496	610.417	1068.22	733.706	960.988	807.952
4-Dodecylbenzenesulfonic Acid	0.523426					12.14_325.1834m/z	325.183	12.1384	neg	HMDB0059915	Benzenoids	Benzene and substituted derivatives	Benzenesulfonic acids and derivatives	M-H	C18H30O3S	41.9	20.6	-2.76987	1.57779	0.0075494	0.0431226	1.43736	1375.64	957.057	970.881	1072.37	1093.35	1847.65	1965.48	1267.61	1385.69	1402.07	871.976	1369.56	1173.12	1029.16	748.86	641.905	669.789	1095.27	761.542	1224.6	941.831
2-Benzoxazolol	0.870876					1.85_135.0315n	153.063	1.85163	pos	HMDB0032931	Organoheterocyclic compounds	Benzoxazoles	Benzoxazolones	M+H, M+NH4, 2M+H	C7H5NO2	42.9	19.9	-4.20815	1.32193	0.00229596	0.0217341	1.82877	523.427	286.218	844.972	351.677	752.335	558.401	476.164	335.863	504.806	363.201	295.472	313.209	433.86	332.194	355.858	293.633	227.972	362.688	69.7787	274.816	188.917
Cefotetan	0.967301	C06886	red			7.46_597.9915m/z	597.991	7.46062	pos	HMDB0015425	Organoheterocyclic compounds	Lactams	Beta lactams	M+Na	C17H17N7O8S4	35.1	0	0.229927	1.44488	0.0143153	0.0628283	1.95518	708.249	362.242	456.366	1431.37	638.478	1003.54	631.191	800.545	321.308	383.197	361.75	822.956	149.348	458.747	322.083	314.053	255.553	414.354	179.579	349.153	357.088
Avicholic acid	-1.45503					8.96_408.2876n	815.568	8.96208	neg	LMST04010107	Lipids and lipid-like molecules	Sterol Lipids	Bile acids and derivatives	M-H, 2M-H, M+FA-H	C24H40O5	40.6	11.6	0.0788018	18.7922	0.0244425	0.0874708	0.364747	34261	93930.9	55737.7	43573.4	83685.7	33603.5	12523.3	18574.1	15352.4	11038.1	47381.7	51192.1	104063	37714.3	154568	51177.6	230982	8374.35	106468	99126.8	142192
3alpha-Hydroxy-5beta-chola-7,9(11)-dien-24-oic Acid	-1.29552					9.52_372.2664n	373.274	9.51915	pos	LMST04010330	Lipids and lipid-like molecules	Sterol Lipids	Bile acids and derivatives	M+H-H2O, M+H	C24H36O3	48.9	46.8	-0.242116	12.0709	0.0231253	0.0845724	0.407389	16759.6	41139	27948.4	21884.1	33406.4	19987.6	7466.76	10894.8	7109.93	5378.5	20718.5	23494.2	38782	17602.5	68993.1	25826.2	93682.6	5542.04	52594.3	50968.5	54325.4
3alpha,9alpha-Dihydroxy-11-oxo-5beta-cholan-24-oic Acid	-2.52452					9.41_406.2707n	407.278	9.4095	pos	LMST04010291	Lipids and lipid-like molecules	Sterol Lipids	Bile acids and derivatives	M+H, 2M+Na, M+H-H2O	C24H38O5	42.8	22.5	-2.93467	3.59025	0.0341494	0.108738	0.173797	470.919	2709.59	1251.24	675.855	942.705	325.315	196.28	193.255	81.1295	101.568	428.44	445.91	2550.47	336.579	4073.67	948.399	8283.98	301.153	2254.37	6444.07	3738.45
12alpha-Hydroxy-3-oxo-5beta-cholan-24-oic Acid	-3.10406					11.25_390.2753n	408.309	11.2452	pos	LMST04010168	Lipids and lipid-like molecules	Sterol Lipids	Bile acids and derivatives	M+NH4, M+Na, M+H-H2O	C24H38O4	47.2	47.9	-4.49386	2.34819	0.0273625	0.0943695	0.116301	124.034	1066.49	148.199	140.708	82.625	167.529	122.779	167.038	87.2967	76.0995	213.273	117.142	673.37	133.677	992.452	812.168	3558.18	118.561	968.03	2328.32	1816.2
3alpha,7alpha,12alpha-trihydroxy-27-carboxymethyl-5beta-cholestan-26-oic acid	-1.016					8.50_508.3385n	507.331	8.49778	neg	LMST04080001	Lipids and lipid-like molecules	Sterol Lipids	Bile acids and derivatives	M-H, M+FA-H	C29H48O7	44.9	31.8	-2.99838	1.54732	0.00152671	0.0171435	0.494485	296.314	599.238	530.27	164.431	277.61	240.971	402.94	276.107	153.899	324.285	359.278	284.545	900.664	505.542	720.873	628.387	791.671	479.452	439.72	666.031	815.456
7alpha,12alpha-dihydroxy-3-oxocholest-4-en-27-oic acid	-1.86298					9.78_446.3013n	445.294	9.77603	neg	LMST04030150	Lipids and lipid-like molecules	Sterol Lipids	Bile acids and derivatives	M-H, M+FA-H	C27H42O5	40.4	21.7	-4.38811	1.29971	0.000476204	0.00837829	0.274907	77.0664	280.336	26.0181	52.3492	38.9275	5.66201	74.1689	80.291	209.327	129.788	200.087	188.343	173.429	318.447	474.92	203.107	466.812	133.261	320.781	387.643	216.863
3alpha,12beta-Dihydroxy-11-oxo-5beta-cholan-24-oic Acid	-1.94337					9.48_424.3042m/z	424.304	9.47783	pos	LMST04010188	Lipids and lipid-like molecules	Sterol Lipids	Bile acids and derivatives	M+NH4	C24H38O5	47.9	50.7	-3.92733	1.60268	0.0435476	0.127132	0.260008	165.977	638.354	310.67	286.529	285.579	178.235	77.6978	124.643	40.0077	24.4573	198.83	169.994	530.593	139.037	1026.72	166.664	2038.36	40.858	876.46	809.11	1025.27
2,12alpha-Dihydroxy-3-oxo-5beta-chol-1-en-24-oic Acid	-3.75028					9.25_422.2885m/z	422.289	9.24583	pos	LMST04010435	Lipids and lipid-like molecules	Sterol Lipids	Bile acids and derivatives	M+NH4	C24H36O5	48.7	54.6	-3.88781	1.01658	0.0392629	0.119212	0.0743112	14.9509	201.193	49.26	13.0504	11.6627	24.081	3.92312	17.6299	1.21358e-08	1.21358e-08	9.03687	6.65782	113.682	5.25644	379.504	13.5539	717.973	0.355269	257.049	361.011	349.044
Homolithocholic acid	-2.74539					13.85_413.3009m/z	413.301	13.8474	pos	LMST04070035	Lipids and lipid-like molecules	Sterol Lipids	Bile acids and derivatives	M+Na	C25H42O3	49.7	56.9	-4.31298	1.04653	0.0026552	0.023755	0.149126	25.1313	168.523	42.3426	48.3001	32.1502	11.5572	16.4035	16.6204	18.3539	15.3224	121.884	131.001	297.114	133.64	245.205	113.59	436.242	63.6747	135.414	124.709	51.2816
3a,7a,12a-Trihydroxy-5b-cholestan-26-al	-5.14908	C01301	blue	rno00120	Primary bile acid biosynthesis	12.23_434.3376n	479.336	12.2331	neg	HMDB0003533	Lipids and lipid-like molecules	Steroids and steroid derivatives	Bile acids, alcohols and derivatives	M-H, 2M-H, M+FA-H	C27H46O4	36	1.16	-4.58502	2.8032	0.0174629	0.0709577	0.0281821	36.0818	1280.31	113.569	72.4514	24.7401	14.8789	15.1411	5.61302	21.0879	21.173	95.4051	149.214	1546.33	141.273	2867.79	155.111	4034.07	38.2894	1868.1	1402.57	1785.25
7alpha-Hydroxy-3-oxo-4-cholestenoate	-1.70409	C17337	blue	rno00120	Primary bile acid biosynthesis	12.03_431.3140m/z	431.314	12.0345	pos	HMDB0012458	Lipids and lipid-like molecules	Steroids and steroid derivatives	Bile acids, alcohols and derivatives	M+H	C27H42O4	49.8	72.6	-3.72272	3.56552	0.000531816	0.00904612	0.306915	672.684	2191.76	1310.38	1140.12	481.561	383.743	540.821	243.623	733.827	547.395	1986.19	1998.52	2324.02	2056.45	2418.41	1010.55	2514.52	470.148	4144.01	2977.46	2209.09
Chenodeoxycholic Acid	-3.06284	C02528	blue	rno00120|rno04976	Primary bile acid biosynthesis|Bile secretion	9.74_392.2916n	785.591	9.74232	pos	207	Lipids and lipid-like molecules	Steroids and steroid derivatives	Bile acids, alcohols and derivatives	M+H-H2O, 2M+H	C24H40O4	52.2	83	-2.82467	7.6231	0.013883	0.0617591	0.119672	1233.06	10303.6	1753.49	1266.51	2385.96	820.323	1420.01	449.014	776.451	992.705	2157.68	941.083	7641.57	634.27	18705.6	7892.09	27750.5	873.759	9797.13	17963.4	18982.6
Deoxycholic acid	-2.69442	C04483	blue	rno04976	Bile secretion	9.71_392.2919n	391.285	9.70822	neg	265	Lipids and lipid-like molecules	Steroids and steroid derivatives	Bile acids, alcohols and derivatives	M-H, 2M-H	C24H40O4	53	69.3	-2.0335	5.61956	0.0306179	0.101387	0.154489	1009.52	6534.53	1385.76	1718.45	634.91	1261.33	648.076	994.431	734.873	698.294	1881.58	1168.21	4918.61	1610.52	5117.79	4874.76	23037.4	1001.7	5742.55	10641.4	11885.2
Taurochenodesoxycholic acid	-3.29474	C05465	blue	rno00120|rno04976|rno04979	Primary bile acid biosynthesis|Bile secretion|Cholesterol metabolism	7.93_482.2917m/z	482.292	7.92675	pos	HMDB0000951	Lipids and lipid-like molecules	Steroids and steroid derivatives	Bile acids, alcohols and derivatives	M+H-H2O	C26H45NO6S	44.3	39.6	-3.60338	1.11716	0.00177903	0.0188533	0.101903	18.5246	181.787	18.6769	4.85922	5.02851	72.5759	10.293	9.39047	19.1117	8.2612	54.1245	25.3013	112.351	152.501	84.3905	226.875	137.839	213.704	234.15	315.373	443.053
Taurocholic acid	-2.55907	C05122	blue	rno00120|rno04976|rno04979|rno00430	Primary bile acid biosynthesis|Bile secretion|Cholesterol metabolism|Taurine and hypotaurine metabolism	7.67_515.2903n	516.299	7.6661	pos	34542	Lipids and lipid-like molecules	Steroids and steroid derivatives	Bile acids, alcohols and derivatives	M+H-H2O, M+H	C26H45NO7S	56	91.4	-2.58374	3.6544	3.03184e-06	0.0003047	0.169685	275.838	1625.59	119.724	122.617	439.907	286.583	319.545	211.471	452.371	254.488	1128.43	670.761	2007.28	1542.99	2195.57	1888.25	1917.21	2429.86	1824.67	1020.46	1255.99
Chenodeoxyglycocholic acid	-1.47241	C05462	blue			8.03_449.3135n	448.306	8.03313	neg	HMDB0006898	Lipids and lipid-like molecules	Steroids and steroid derivatives	Bile acids, alcohols and derivatives	M-H, 2M-H	C26H43NO5	41.8	11.7	-1.27859	2.70876	0.0488087	0.137051	0.360381	764.899	2122.47	559.495	620.054	118.567	807.959	515.033	35.4445	1240.82	2221.82	2646.46	782.167	6305.35	990.791	619.598	3111.06	907.181	1005.42	1270.28	3159.65	2549.25
Hyocholic acid	-1.92237	C17649	blue			9.83_389.2687m/z	389.269	9.83003	neg	HMDB0000760	Lipids and lipid-like molecules	Steroids and steroid derivatives	Bile acids, alcohols and derivatives	M-H2O-H	C24H40O5	41.1	15.7	-2.649	1.35555	0.0192747	0.075614	0.263821	107.073	405.854	275.609	192.973	136.14	64.9916	44.6472	65.7398	34.9564	41.5239	122.183	93.6901	470.416	69.1854	562.176	310.887	1059.69	37.6357	490.434	669.696	578.404
Lithocholic acid glycine conjugate	-1.97461	C15557	blue			8.03_478.3154m/z	478.315	8.03313	neg	HMDB0000698	Lipids and lipid-like molecules	Steroids and steroid derivatives	Bile acids, alcohols and derivatives	M+FA-H	C26H43NO4	43.2	29.2	-4.7481	1.02243	0.00213767	0.020841	0.254439	45.5897	179.177	13.6332	19.0655	4.0556	93.6564	19.3886	9.7498	65.513	139.656	107.11	99.4878	347.565	299.231	86.7809	168.74	89.0781	183.905	89.9204	277.537	221.594
Tauroursodeoxycholic acid	-2.16739	C16868	blue			8.07_499.2960n	498.289	8.07415	neg	HMDB0000874	Lipids and lipid-like molecules	Steroids and steroid derivatives	Bile acids, alcohols and derivatives	M-H, 2M-H	C26H45NO6S	39.2	0.505	-1.43664	3.62633	0.00071297	0.0109256	0.222613	447.883	2011.93	344.565	261.659	871.897	328.919	441.623	298.304	731.627	304.471	1277.39	1752.99	4370.7	3407.94	1363.57	1850.1	1167.83	2622.99	1845.9	1020.18	1451.69
Isohyodeoxycholic acid	-2.1977					9.18_392.2922n	437.29	9.1794	neg	5634	Lipids and lipid-like molecules	Steroids and steroid derivatives	Bile acids, alcohols and derivatives	M+FA-H, 2M-H, M-H	C24H40O4	38.9	2.15	-1.1799	16.9934	0.00792286	0.0443798	0.217984	11808.8	54172.7	19622.4	14760.4	22710	6275.11	11029.3	1266.43	8534.75	10272.1	21992.7	10968.1	57104.4	6714.26	90120.1	47984.5	117967	9083.86	53778.2	83051.7	97134.6
Hyodeoxycholic acid	-1.97764					10.55_392.2921n	391.285	10.552	neg	5701	Lipids and lipid-like molecules	Steroids and steroid derivatives	Bile acids, alcohols and derivatives	M-H, 2M-H	C24H40O4	44.5	26.5	-1.37396	7.05595	0.0146681	0.0635863	0.253905	2676.65	10541.9	3205.45	2284.53	1916.4	3479.84	2276.52	3050.27	3162.47	2037.72	4795.36	1757.91	8215.7	2309.94	11473.8	12514.3	25991.7	2823.2	7367.55	21049.8	17661.8
12-Ketodeoxycholic acid	-3.4044					9.42_390.2765n	435.275	9.42355	neg	HMDB0000328	Lipids and lipid-like molecules	Steroids and steroid derivatives	Bile acids, alcohols and derivatives	M+FA-H, 2M-H, M-H	C24H38O4	39.8	2.73	-1.30005	6.29903	0.00923935	0.0485307	0.0944438	620.493	6569.97	1312.09	938.365	585.077	322.965	632.564	48.2676	440.684	683.935	1357.57	970.236	7772.29	958.699	6897.68	8100.57	19882.4	526.022	7448.6	9598.77	8756.91
7-Ketodeoxycholic acid	-1.99594					8.81_451.2694m/z	451.269	8.81193	neg	HMDB0000391	Lipids and lipid-like molecules	Steroids and steroid derivatives	Bile acids, alcohols and derivatives	M+FA-H	C24H38O5	50.4	58.2	-1.70617	5.89153	0.0186898	0.0741743	0.250705	1861.75	7426.06	5185.02	3014.25	3777.84	862.774	692.699	713.017	288.223	360.199	1855.52	3272.9	9605.94	1474.65	11244.7	3173.67	18868	928.946	7409.23	12786.6	11066.5
Sulfoglycolithocholate(2-)	-2.03327					6.88_513.2748n	514.282	6.88415	pos	HMDB0062801	Lipids and lipid-like molecules	Steroids and steroid derivatives	Bile acids, alcohols and derivatives	M+H, M+NH4, M+Na, M+H-H2O	C26H43NO7S	44	35.7	-2.316	5.29273	0.00162364	0.017801	0.2443	1145.59	4689.27	1425.4	1162.55	1856.28	1891.04	1026.07	680.995	698.516	423.85	2551.48	1735.64	4775.37	3752.12	9792.08	2270.74	8403.76	4819.52	6626.74	2502.95	4351.52
Tauro-b-muricholic acid	-3.23518					7.68_515.2903n	533.324	7.67995	pos	HMDB0000932	Lipids and lipid-like molecules	Steroids and steroid derivatives	Bile acids, alcohols and derivatives	M+NH4, M+Na	C26H45NO7S	45.1	32.6	-2.70331	2.54365	9.19793e-06	0.000621835	0.106197	79.3022	746.743	23.9554	22.6286	228.35	101.429	56.2372	96.8643	59.3342	45.6185	644.979	456.74	963.305	1003.67	829.781	455.773	811.515	1293.32	926.558	319.62	508.916
N-[(3a,5b,7b)-7-hydroxy-24-oxo-3-(sulfooxy)cholan-24-yl]-Glycine	-2.65028					6.72_510.2518m/z	510.252	6.72322	neg	HMDB0002409	Lipids and lipid-like molecules	Steroids and steroid derivatives	Bile acids, alcohols and derivatives	M-H2O-H	C26H43NO8S	39.6	12.5	-2.38265	2.12256	5.71234e-06	0.000450249	0.159289	86.2056	541.19	96.6411	81.729	149.05	111.708	73.2321	90.7515	51.7509	34.7819	406.822	330.165	794.226	823.544	622.513	463.523	757.261	604.634	537.789	308.012	304.607
3b,4b,7a,12a-Tetrahydroxy-5b-cholanoic acid	-3.22497					7.03_424.2808n	423.274	7.0337	neg	HMDB0000311	Lipids and lipid-like molecules	Steroids and steroid derivatives	Bile acids, alcohols and derivatives	M-H, M+FA-H	C24H40O6	42.8	28	-3.87793	1.0978	0.0293883	0.0986702	0.106951	24.9112	232.92	94.7926	28.5991	8.32543	39.5644	2.82144	6.36161	5.99305	12.8317	15.2055	32.3624	210.058	68.7208	620.056	25.9865	545.489	41.0521	181.515	201.892	619.786
Taurallocholic acid	-2.5459					7.19_498.2866m/z	498.287	7.1868	pos	HMDB0000922	Lipids and lipid-like molecules	Steroids and steroid derivatives	Bile acids, alcohols and derivatives	M+H-H2O	C26H45NO7S	45.1	32	-3.52988	1.94587	0.0317431	0.103802	0.171241	139.308	813.518	394.431	109.748	84.6006	356.269	46.4994	27.6383	56.756	38.5189	220.583	142.354	434.433	394.114	502.223	380.576	932.529	505.175	1247.26	1259.22	2930.23
7alpha-hydroxy-3-oxochol-4-en-24-oic Acid	-1.8644					9.45_388.2599n	433.258	9.45088	neg	HMDB0062744	Lipids and lipid-like molecules	Steroids and steroid derivatives	Bile acids, alcohols and derivatives	M-H, M+FA-H	C24H36O4	42.2	23.5	-3.8355	1.27962	0.0142408	0.062749	0.274637	94.4952	344.073	243.331	184.365	66.1683	42.5983	45.9653	34.921	51.3215	87.2904	111.547	259.64	485.763	149.373	371.98	142.864	449.416	42.5233	464.181	925.43	382.085
Chenodeoxycholic acid 3-sulfate	-2.25036					8.09_471.2408m/z	471.241	8.08763	neg	HMDB0002586	Lipids and lipid-like molecules	Steroids and steroid derivatives	Bile acids, alcohols and derivatives	M-H	C24H40O7S	38.6	1.46	-3.06359	1.81492	0.00738853	0.0426956	0.210171	128.837	613.009	291.45	134.251	145.541	102.169	69.479	88.7982	94.4491	104.557	254.5	208.386	513.998	168.314	877.802	349.228	1339.87	143.743	627.571	988.765	1270.92
Glycoursodeoxycholic acid	-1.43916					8.47_448.3057m/z	448.306	8.47045	neg	HMDB0000708	Lipids and lipid-like molecules	Steroids and steroid derivatives	Bile acids, alcohols and derivatives	M-H	C26H43NO5	43.7	25.7	-2.49851	1.57715	0.0189534	0.0748368	0.368782	225.161	610.554	199.563	285.316	18.3643	391.414	108.273	108.286	313.636	376.439	595.822	528.232	1498.92	694.643	153.303	429.748	495.589	125.018	309.778	912.717	972.32
Telmisartan	0.690667	C07710	red			3.76_532.2715m/z	532.272	3.76173	pos	HMDB0015101	Benzenoids	Benzene and substituted derivatives	Biphenyls and derivatives	M+NH4	C33H30N4O2	36.2	9.04	1.63779	2.03897	0.00307785	0.0259572	1.61403	1448.3	897.317	1062.82	1191.87	1296.17	2013.78	964.571	1735.11	1663.01	1659.04	796.626	702.982	1483.19	903.188	658.927	893.869	921.2	682.839	903.479	440.259	1483.92
(6E,8E)-4,6,8-Megastigmatriene	0.943694					9.18_221.1544m/z	221.154	9.1794	neg	HMDB0035180	Hydrocarbons	Unsaturated hydrocarbons	Branched unsaturated hydrocarbons	M+FA-H	C13H20	41.4	9.33	-1.47151	1.00093	0.00282368	0.0246854	1.92345	260.895	135.639	363.617	121.519	166.793	221.102	218.747	212.185	361.853	421.345	192.143	201.846	105.828	195.812	139.932	131.072	101.586	157.413	103.613	66.6519	96.1369
D-Glucose	0.6847	C00031	red	rno04976|rno04932|rno04910|rno04068|rno04930|rno04933|rno04917|rno02010|rno04911|rno04066|rno04931|rno04152|rno04922|rno04973|rno04978|rno00010|rno04742|rno00030|rno00500|rno05230|rno00052|rno00524|rno00520	Bile secretion|Non-alcoholic fatty liver disease (NAFLD)|Insulin signaling pathway|FoxO signaling pathway|Type II diabetes mellitus|AGE-RAGE signaling pathway in diabetic complications|Prolactin signaling pathway|ABC transporters|Insulin secretion|HIF-1 signaling pathway|Insulin resistance|AMPK signaling pathway|Glucagon signaling pathway|Carbohydrate digestion and absorption|Mineral absorption|G…	0.67_383.1164m/z	383.116	0.671533	pos	HMDB0000122	Organic oxygen compounds	Organooxygen compounds	Carbohydrates and carbohydrate conjugates	2M+Na	C6H12O6	50.9	61.4	1.21001	3.44408	0.0044322	0.0318738	1.60737	4593.47	2857.76	3553.84	4987.94	3836.7	4722.5	4924.27	5978.14	5212.36	3532.02	4479.49	5143.37	4527.99	3265.16	2405.63	2052.62	1481.22	1929.58	2321.45	2247.87	1580.97
Dihydroxyacetone	-0.462211	C00184	blue	rno00561|rno01200	Glycerolipid metabolism|Carbon metabolism	0.77_90.0317n	89.0249	0.76675	neg	HMDB0001882	Organic oxygen compounds	Organooxygen compounds	Carbohydrates and carbohydrate conjugates	M-H2O-H, M-H	C3H6O3	43.6	18.2	-0.111021	1.33624	0.0027688	0.024338	0.725873	661.91	911.881	763.196	468.527	837.216	616.599	727.274	682.882	566.038	633.546	1057.17	675.759	640.019	798.337	916.869	944.582	1204.58	1015.51	1095.56	876.669	805.647
6-{[3-(3,4-dihydroxyphenyl)-2-oxopropanoyl]oxy}-3,4,5-trihydroxyoxane-2-carboxylic acid	0.974059					16.68_355.0678m/z	355.068	16.6774	pos	HMDB0125449	Organic oxygen compounds	Organooxygen compounds	Carbohydrates and carbohydrate conjugates	M+H-H2O	C15H16O11	37.9	0	4.93723	2.79044	6.14889e-07	0.000109336	1.96436	1570.82	799.659	1402.21	1451.1	1227.69	1627.02	1817.36	1842.18	1457.34	1741.64	1059.47	1229.62	592.84	942.916	708.702	705.76	609.22	755.355	829.527	840.11	522.727
p-Cresol glucuronide	-1.59509					3.74_284.0903n	283.083	3.7429	neg	HMDB0011686	Organic oxygen compounds	Organooxygen compounds	Carbohydrates and carbohydrate conjugates	M-H, 2M-H, M-H2O-H	C13H16O7	46.2	34.2	2.37663	3.54984	0.0200683	0.077324	0.331001	1016.35	3070.53	256.061	217.459	570.683	76.239	2911.94	92.3117	1937.95	2068.14	2342.91	320.632	1739.3	778.028	7288.12	5369.2	3708.13	2009.56	2340.14	3844.96	4034.8
3,4,5-trihydroxy-6-{2-hydroxy-5-[(1E)-3-oxo-3-[(3,4,5,6-tetrahydroxyoxan-2-yl)methoxy]prop-1-en-1-yl]phenoxy}oxane-2-carboxylic acid	0.659901					17.39_519.1359m/z	519.136	17.3893	pos	HMDB0125185	Organic oxygen compounds	Organooxygen compounds	Carbohydrates and carbohydrate conjugates	M+H	C21H26O15	38.3	0	2.90051	2.01989	7.78411e-05	0.00257196	1.57997	1220.84	772.698	1126.93	1061.22	1089.88	1359.29	1293.29	1436.94	1096.29	1302.92	976.372	1207.15	558.862	935.4	633.776	779.707	644.46	672.397	770.104	854.086	467.368
Cytochalasin B	-1.4253					6.74_479.2689n	480.275	6.738	pos	LMPK11000002	Lipids and lipid-like molecules	Polyketides	Cytochalasins	M+H-H2O, M+H	C29H37NO5	40.2	8.92	3.63133	1.36236	0.00248364	0.0227778	0.372341	141.994	381.354	202.834	228.156	311.692	96.0937	88.467	90.1704	78.1292	40.4091	422.929	346.161	773.75	464.924	357.455	194.676	308.885	465.741	459.092	117.842	283.441
Cytochalasin A	-3.004					6.88_477.2524n	478.26	6.88415	pos	LMPK11000001	Lipids and lipid-like molecules	Polyketides	Cytochalasins	M+H-H2O, M+H	C29H35NO5	38	3.42	1.84045	1.48222	0.00649817	0.0394801	0.124654	44.463	356.692	46.7534	16.6131	54.0621	129.701	49.4412	24.1218	26.6343	8.37755	102.209	51.5808	269.536	211.722	905.027	155.476	803.994	347.982	533.046	185.189	357.846
Hydroxyzine	-0.667414	C07045	blue			14.19_355.1579m/z	355.158	14.1858	neg	HMDB0014697	Benzenoids	Benzene and substituted derivatives	Diphenylmethanes	M-H2O-H	C21H27ClN2O2	34.8	0	-1.07768	1.22505	0.00672861	0.0402915	0.629634	356.957	566.927	254.683	268.815	360.122	392.924	422.246	422.023	426.697	308.142	391.833	283.286	574.616	532.454	517.969	766.073	783.154	619.553	496.15	871.448	399.662
Oxatomide	-1.85792					7.94_471.2408m/z	471.241	7.93782	neg	HMDB0240225	Benzenoids	Benzene and substituted derivatives	Diphenylmethanes	M+FA-H	C27H30N4O	36.6	0.854	1.3864	1.36377	0.0104188	0.052202	0.275874	109.754	397.84	249.589	128.872	130.103	62.7109	67.6384	38.4929	46.8619	153.762	119.766	135.815	334.533	86.4369	868.382	347.466	617.832	104.11	500.117	511.504	750.273
Ecabet	-0.979519					13.70_379.1574m/z	379.157	13.6966	neg	HMDB0015613	Lipids and lipid-like molecules	Prenol lipids	Diterpenoids	M-H	C20H28O5S	43.2	25.3	-2.68399	1.91794	0.00239699	0.0223398	0.507149	486.619	959.52	349.986	348.782	325.228	495.288	549.6	541.999	788.368	493.705	583.285	535.834	940.569	1196.68	891.6	1151.18	1448.08	850.946	750.403	1588.45	617.696
5-Oxo-ETE-d7	0.623237					16.07_649.5212m/z	649.521	16.0693	neg	LMFA03060083	Lipids and lipid-like molecules	Fatty Acyls	Eicosanoids	2M-H	C20H23D7O3	36.5	0.0122	2.45097	1.32095	4.90511e-05	0.00190079	1.54033	544.934	353.778	510.301	743.06	545.602	406.631	550.84	445.705	532.589	624.745	405.34	402.049	269.766	333.924	336.857	367.193	322.591	351.158	339.8	442.689	320.192
Bimatoprost	-1.97235					7.64_460.2692m/z	460.269	7.64017	neg	HMDB0015041	Lipids and lipid-like molecules	Fatty Acyls	Eicosanoids	M+FA-H	C25H37NO4	43.8	27.4	-2.9323	1.19515	0.0463257	0.132548	0.254837	84.6909	332.333	138.904	86.6731	23.3502	193.411	17.57	24.526	77.2981	115.795	240.178	280.404	1251.42	464.405	91.8887	198.264	210.658	201.654	156.289	294.675	265.833
5S-HETE di-endoperoxide	4.91792					13.53_403.2322m/z	403.232	13.5319	pos	LMFA03000011	Lipids and lipid-like molecules	Fatty Acyls	Eicosanoids	M+H	C20H34O8	38.2	13	-1.22879	1.77405	8.8504e-08	2.96488e-05	30.2302	309.474	10.2373	485.107	171.902	202.364	247.752	305.845	361.317	444.847	256.66	1.90125	6.82715	1.26043	1.79926	13.2665	31.1889	10.304	1.98292	6.61547	23.0992	14.3647
PGE2-dihydroxypropanylamine	-1.15692					8.96_470.2744m/z	470.274	8.96208	neg	LMFA03010192	Lipids and lipid-like molecules	Fatty Acyls	Eicosanoids	M+FA-H	C23H39NO6	39.4	4.55	-3.53582	1.12216	0.0116795	0.0558725	0.448468	156.686	349.38	237.922	200.834	370.122	170.708	58.4626	92.8109	77.0031	45.6222	244.655	266.826	445.359	193.882	549.565	250.987	598.563	32.1036	440.192	398.899	422.147
PGE1 alcohol	-0.86639					11.96_340.2608n	321.243	11.9622	neg	LMFA03010053	Lipids and lipid-like molecules	Fatty Acyls	Eicosanoids	M-H2O-H, M-H	C20H36O4	39.9	5.26	-1.61612	2.32688	0.00322644	0.0266283	0.548518	877.741	1600.21	941.412	1136.59	1122.49	578.248	1181.06	1356.7	381.005	324.415	1980.91	1056.78	1342.44	993.47	2209.05	1684.88	2317	1454.94	1341.31	2136.6	1084.87
Linoelaidyl carnitine	-1.5738					11.34_424.3407m/z	424.341	11.3409	pos	HMDB0006461	Lipids and lipid-like molecules	Fatty Acyls	Fatty acid esters	M+H	C25H45NO4	42.3	20.1	-3.41718	3.06639	0.00666571	0.0401355	0.335924	694.783	2068.28	382.838	305.1	273.476	937.165	1020.78	1015.38	865.51	758.012	754.962	478.68	766.503	850.616	1894.62	3058.36	2858.76	2727	2865.99	4229.21	2266.33
2,6 Dimethylheptanoyl carnitine	0.292157					0.33_324.2158m/z	324.216	0.329567	pos	HMDB0006320	Lipids and lipid-like molecules	Fatty Acyls	Fatty acid esters	M+Na	C16H31NO4	35.6	0.0267	4.25525	1.52776	0.0076238	0.0433898	1.22447	1926.83	1573.6	1638.7	1781.38	1717.37	2133.86	2172.32	2045.48	1943.33	1982.21	1852.11	2084.43	1265.12	1818.23	1377	1478.89	1371.46	1608.18	1695.79	1634.9	1123.53
3-hydroxytetradecanoyl carnitine	-1.16073					10.21_370.2935m/z	370.294	10.2119	pos	HMDB0061640	Lipids and lipid-like molecules	Fatty Acyls	Fatty acid esters	M+H-H2O	C21H41NO5	39.2	10.3	-4.26689	1.31244	0.0252215	0.0892333	0.447286	236.623	529.02	156.195	174.746	89.3939	364.285	311.458	412.813	184.69	199.404	188.521	101.113	215.009	149.566	579.971	640.797	853.128	574.917	797.241	1052.95	666.006
7-oxo-8-amino-nonanoic acid	0.985526	C01092	red	rno00780	Biotin metabolism	3.63_186.1138m/z	186.114	3.63158	neg	LMFA01060168	Lipids and lipid-like molecules	Fatty Acyls	Fatty Acids and Conjugates	M-H	C9H17NO3	46.9	40	0.987237	1.05475	0.0153145	0.0653317	1.98003	342.084	172.767	120.79	222.031	348.791	281.561	263.077	411.393	720.227	368.805	370.196	276.194	120.452	113.627	83.5589	120.132	78.9865	210.912	237.84	89.2476	199.288
Arachidic acid	-0.798834	C06425	blue	rno01040	Biosynthesis of unsaturated fatty acids	11.23_330.3354m/z	330.335	11.2316	pos	LMFA01010020	Lipids and lipid-like molecules	Fatty Acyls	Fatty Acids and Conjugates	M+NH4	C20H40O2	45	33.9	-4.10129	1.35254	0.014001	0.0621921	0.574814	379.341	659.937	918.194	205.73	408.503	329.5	411.532	384.575	168.173	208.52	432.868	657.979	1160.25	703.529	474.295	492.792	574.494	630.063	538.258	775.104	819.672
DHA	-0.924023	C02218	blue	rno00270	Cysteine and methionine metabolism	13.44_328.2403n	327.233	13.4401	neg	LMFA01030185	Lipids and lipid-like molecules	Fatty Acyls	Fatty Acids and Conjugates	M-H, 2M-H	C22H32O2	49.3	47.8	0.325919	5.36848	0.00999432	0.0509818	0.527037	4701.16	8919.98	5581.6	3849.42	5560.12	5377.19	5146.83	5783.89	3942.64	2367.61	4533.91	3601.55	7995.05	7659.01	8087.53	10724.7	14843	8257.25	7790.49	16948.8	7678.47
Docosahexaenoic acid	-1.2935	C06429	blue	rno01040	Biosynthesis of unsaturated fatty acids	14.12_328.2395n	329.247	14.1151	pos	HMDB0002183	Lipids and lipid-like molecules	Fatty Acyls	Fatty acids and conjugates	M+H, M+Na, M+NH4, M+H-H2O	C22H32O2	50.4	58.3	-2.31495	2.60926	0.00892543	0.0475025	0.407961	686.893	1683.72	899.907	577.85	733.176	807.066	718.941	929.127	497.225	331.853	635.598	582.889	1327.24	1172.36	1461.4	1936.69	3057.68	1594.37	1865.33	3624.31	1263.11
Docosapentaenoic acid (22n-3)	-1.38661	C16513	blue	rno01040	Biosynthesis of unsaturated fatty acids	13.74_330.2556n	329.248	13.7371	neg	HMDB0006528	Lipids and lipid-like molecules	Fatty Acyls	Fatty acids and conjugates	M-H, 2M-H	C22H34O2	42.9	20.7	-0.809394	1.90027	0.0274299	0.0943695	0.382462	364.261	952.412	414.456	358.959	263.151	552.633	374.933	491.608	320.931	137.421	352.761	304.027	799.739	684.412	1038.05	884.897	1591.8	665.995	779.451	2705.83	669.573
Eicosapentaenoic acid	-1.62435	C06428	blue	rno01040	Biosynthesis of unsaturated fatty acids	13.71_302.2231n	303.23	13.7091	pos	HMDB0001999	Lipids and lipid-like molecules	Fatty Acyls	Fatty acids and conjugates	M+H, M+NH4, M+H-H2O	C20H30O2	47.1	50.6	-4.93544	1.27248	0.0256375	0.090195	0.324357	127.717	393.755	148.602	112.029	109.151	233.248	154.464	174.988	54.5409	34.7145	79.3843	55.8659	205.4	224.835	389.45	454.397	551.564	404.605	588.788	1127.28	249.737
Oleic acid	-1.13184	C00712	blue	rno01040|rno00061	Biosynthesis of unsaturated fatty acids|Fatty acid biosynthesis	14.35_282.2559n	281.249	14.3529	neg	HMDB0000207	Lipids and lipid-like molecules	Fatty Acyls	Fatty acids and conjugates	M-H, 2M-H	C18H34O2	39.2	0.00255	0.0806635	2.46362	0.00463578	0.0325422	0.456333	701.009	1536.18	570.515	538.871	510.789	705.293	772.571	783.755	1018.93	707.347	544.562	828.166	1727.37	1644.73	1030.63	2242.69	2588	1428.4	1439.49	2579.74	844.2
Tetracosahexaenoic acid	-2.34882					9.73_356.2699n	357.279	9.72865	pos	HMDB0002007	Lipids and lipid-like molecules	Fatty Acyls	Fatty acids and conjugates	M+H-H2O, M+H	C24H36O2	56.3	89.1	-4.62251	11.5968	0.00976258	0.0504074	0.196307	4922.51	25075.6	7880.61	5822.8	8893.64	3118.26	5434.43	575.25	3250.02	4405.07	8091.56	4535.85	21433.2	2899.29	43103.6	22071.5	59767.6	4127.55	27078.2	41825	40897.8
Ethyl 2-Bromo-2-iodoacetate	-0.403371					17.34_336.8585m/z	336.858	17.3362	neg	LMFA01090144	Lipids and lipid-like molecules	Fatty Acyls	Fatty Acids and Conjugates	M+FA-H	C4H6BrIO2	30.8	0	2.38059	1.84114	0.00735681	0.0425688	0.756089	1612.28	2132.39	1304.48	1592.55	1964.42	1703.06	1312.84	1557.6	2044.49	1418.79	2503.94	3112.41	1694.51	2421.9	1734.83	2014.68	1983.7	2060.84	2233.1	1925.37	1771.04
Juniperic acid	1.91239					9.22_290.2685m/z	290.268	9.21885	pos	LMFA01050051	Lipids and lipid-like molecules	Fatty Acyls	Fatty Acids and Conjugates	M+NH4	C16H32O3	50.1	55.9	-1.90928	1.79832	0.000475296	0.00837829	3.76432	497.416	132.14	1022.14	201.936	220.366	549.403	318.091	493.185	499.144	675.059	184.494	49.9725	116.648	24.0524	165.576	262.273	169.296	234.47	108.876	65.9514	71.9288
2,15,16-trihydroxy palmitic acid	-1.8166					10.54_304.2245n	285.207	10.5383	neg	LMFA01050099	Lipids and lipid-like molecules	Fatty Acyls	Fatty Acids and Conjugates	M-H2O-H, M+FA-H	C16H32O5	47.7	45.6	-1.42965	1.16393	0.00134118	0.0158886	0.283889	68.4799	241.22	74.3725	61.9767	76.5803	57.5529	68.5096	83.6138	61.7948	63.4382	100.94	65.2573	225.64	100.678	301.285	215.182	509.778	234.682	302.894	331.377	265.71
15-Nonacosanol	1.1089					8.51_866.9656m/z	866.966	8.50938	pos	HMDB0033180	Lipids and lipid-like molecules	Fatty Acyls	Fatty alcohols	2M+NH4	C29H60O	37.5	0	3.478	1.46783	0.0147126	0.0636877	2.15682	622.018	288.397	645.402	359.369	306.251	1317.35	524.196	757.824	284.113	781.639	241.112	151.725	96.4797	340.403	352.045	529.046	298.507	713.783	159.942	83.9376	205.382
N-(4-benzenesulfonamide) arachidonoyl amine	-2.95317					9.42_458.2620n	457.255	9.42355	neg	LMFA08020050	Lipids and lipid-like molecules	Fatty Acyls	Fatty amides	M-H, M+FA-H	C26H38N2O3S	36.6	0	3.60705	1.57617	0.00462413	0.0324983	0.129124	51.4682	398.596	110.769	75.1562	45.4715	27.0176	57.1707	1.65027	34.4974	60.0126	95.6814	58.5951	530.928	71.1757	479.545	509.567	973.289	32.1391	482.171	593.138	558.325
N-palmitoyl histidine	-1.24787					11.49_438.2962m/z	438.296	11.4851	neg	LMFA08020132	Lipids and lipid-like molecules	Fatty Acyls	Fatty amides	M+FA-H	C22H39N3O3	39.4	7.19	-2.9525	1.02082	0.00291563	0.0250624	0.421068	101.412	240.844	173.423	139.113	117.506	106.564	79.1761	74.1107	86.5387	34.8645	187.233	146.1	195.625	205.753	151.372	247.57	491.407	192.726	162.4	367.792	301.311
14,14,14-Trifluoro-11Z-tetradecenyl acetate	0.505881					0.86_309.2028m/z	309.203	0.85935	pos	LMFA07010328	Lipids and lipid-like molecules	Fatty Acyls	Fatty esters	M+H	C16H27F3O2	39.4	4.4	-2.48896	1.54049	0.0200609	0.07732	1.41999	1373.13	966.999	2319.21	1073.48	920.261	1130.4	1865.61	1151.7	1387.91	1136.46	1174.95	1018.02	813.296	986.725	811.833	899.367	907.43	1075.36	1366.16	937.07	646.782
Elaidic carnitine	-1.41205					11.89_425.3495n	426.357	11.8855	pos	LMFA07070063	Lipids and lipid-like molecules	Fatty Acyls	Fatty esters	M+H, M+Na	C25H47NO4	43.9	25.8	-2.36203	3.82587	0.0144823	0.0631076	0.375777	1400.56	3727.1	817.067	678.725	548.211	1807.27	1748.51	2439.86	1555.31	1609.49	1244.72	683.519	1596.13	1521.91	3474.46	5186.67	5240.77	4764.52	4708.81	8525.34	4051.2
Pelargonidin 3-(6''-p-coumarylsambubioside)-5-(6'''-malonylglucoside)	-6.21585					9.74_982.2383m/z	982.238	9.74232	pos	LMPK12010055	Lipids and lipid-like molecules	Polyketides	Flavonoids	M+Na	C44H47O24+	33.9	1	3.44475	1.45055	0.023601	0.0856353	0.0134538	4.81272	357.723	9.71148	3.39006	24.6602	1.21358e-08	0.740021	1.21358e-08	1.21358e-08	1.21358e-08	11.694	1.21358e-08	218.384	1.21358e-08	706.992	194.07	1164.69	1.21358e-08	244.612	598.559	795.958
Ascorbic acid-2-sulfate	1.09062					0.70_254.9814m/z	254.981	0.703767	neg	HMDB0060649	Organoheterocyclic compounds	Dihydrofurans	Furanones	M-H	C6H8O9S	49.4	52.4	-1.07428	1.18812	2.77875e-05	0.00131936	2.12966	297.574	139.729	217.614	463.471	314.765	211.158	306.495	285.803	363.524	217.765	180.469	155.531	119.82	141.841	204.103	116.777	114.53	128.447	121.992	121.516	131.99
LysoPA(20:2(11Z,14Z)/0:0)	-0.962654					8.96_443.2548m/z	443.255	8.96208	neg	HMDB0114758	Lipids and lipid-like molecules	Glycerophospholipids	Glycerophosphates	M-H2O-H	C23H43O7P	35.4	5.45	-4.21996	2.25188	0.0176946	0.0716096	0.513112	861.024	1678.04	1341.9	1196.71	1922.86	899.465	329.534	483.315	422.013	292.395	1248.42	1315.52	2211.65	1003.67	2325.42	1302.8	2705.11	221.521	2143.68	1951.85	2028.84
PA(18:0/18:4(6Z,9Z,12Z,15Z))	-1.26741					13.44_677.4531m/z	677.453	13.4401	neg	HMDB0114880	Lipids and lipid-like molecules	Glycerophospholipids	Glycerophosphates	M-H2O-H	C39H69O8P	38.5	0.841	-3.00661	1.14221	0.0090227	0.0477882	0.415406	134.512	323.809	187.188	76.2828	149.655	182.631	158.691	197.464	88.1985	35.9878	97.5112	66.1619	311.703	242.674	317.434	415.362	569.835	315.617	317.997	644.399	263.204
PA(21:4(6Z,9Z,12Z,15Z)/0:0)	1.28714					12.54_471.2499m/z	471.25	12.5435	neg	LMGP10050003	Lipids and lipid-like molecules	Glycerophospholipids	Glycerophosphates	M-H	C24H41O7P	37	5.93	-3.76936	1.73972	1.90647e-05	0.00100842	2.44044	564.918	231.482	634.049	465.84	697.545	680.975	710.857	365.038	427.589	537.45	410.718	403.821	263.314	282.355	86.0413	217.409	276.062	251.664	112.288	144.586	98.0396
LysoPC(22:4(7Z,10Z,13Z,16Z))	0.843011	C04230	red	rno05231|rno00564	Choline metabolism in cancer|Glycerophospholipid metabolism	11.81_616.3599m/z	616.36	11.8121	neg	HMDB0010401	Lipids and lipid-like molecules	Glycerophospholipids	Glycerophosphocholines	M+FA-H	C30H54NO7P	53.3	78.8	-3.68066	1.20892	0.00886183	0.0472892	1.79379	462.526	257.848	538.107	352.124	664.31	185.406	262.477	317.048	725.899	654.839	300.898	267.447	475.65	330.415	181.96	198.118	226.156	198.441	242.712	228.586	185.951
LysoPC(15:0)	-0.617966	C04230	blue	rno05231|rno00564	Choline metabolism in cancer|Glycerophospholipid metabolism	10.72_526.3136m/z	526.314	10.716	neg	HMDB0010381	Lipids and lipid-like molecules	Glycerophospholipids	Glycerophosphocholines	M+FA-H	C23H48NO7P	49	56.4	-2.98843	4.00665	0.00363898	0.0285738	0.651589	4045.48	6208.65	6690.17	3754.29	4655.47	4077.53	3560.19	3098.98	3858.17	2669.08	4503.56	5791.74	9247.51	4752.61	4437.69	5858.59	6727.34	6284.76	7918.95	7085.05	5687.32
LysoPC(18:0)	0.211226	C04230	red	rno05231|rno00564	Choline metabolism in cancer|Glycerophospholipid metabolism	12.60_568.3617m/z	568.362	12.5979	neg	HMDB0010384	Lipids and lipid-like molecules	Glycerophospholipids	Glycerophosphocholines	M+FA-H	C26H54NO7P	54.4	73.4	-0.62998	7.88432	0.00119351	0.0150516	1.15767	58700.2	50705.4	57645.1	56549.4	70916.6	55090.7	59754.1	57585.2	58765.5	53294.6	51122.4	56738.9	51008.4	51955.3	46405.5	52208.1	52555.9	51558.4	44840.7	53834.7	45530.8
LysoPC(20:1(11Z))	-0.352182	C04230	blue	rno05231|rno00564	Choline metabolism in cancer|Glycerophospholipid metabolism	12.86_594.3762m/z	594.376	12.8625	neg	HMDB0010391	Lipids and lipid-like molecules	Glycerophospholipids	Glycerophosphocholines	M+FA-H	C28H56NO7P	53.3	73.4	-2.71395	1.61563	0.00192613	0.0196964	0.783398	1320.37	1685.44	1907.5	1209.5	1491.01	1153.77	1076.4	1185.59	1333.81	1205.39	1798.01	1702.34	1776.48	1606.63	1593.38	1822.59	2013.93	1540.22	1706.18	1580.93	1399.13
LysoPC(14:0/0:0)	-0.835884	C04230	blue	rno05231|rno00564	Choline metabolism in cancer|Glycerophospholipid metabolism	10.72_466.2921m/z	466.292	10.716	neg	HMDB0010379	Lipids and lipid-like molecules	Glycerophospholipids	Glycerophosphocholines	M-H	C22H46NO7P	43.4	23.5	-3.78153	1.08305	0.000829145	0.0120042	0.56024	182.924	326.511	319.029	163.953	208.77	189.03	162.364	139.483	166.743	114.024	218.943	310.014	488.7	230.131	226.496	300.037	371.144	330.35	422.957	375.902	316.947
LysoPC(22:5(7Z,10Z,13Z,16Z,19Z))	1.54972	C04230	red	rno05231|rno00564	Choline metabolism in cancer|Glycerophospholipid metabolism	12.12_569.3453n	570.353	12.1162	pos	HMDB0010403	Lipids and lipid-like molecules	Glycerophospholipids	Glycerophosphocholines	M+H, M+Na	C30H52NO7P	44.2	37.3	-4.993	1.70259	0.0345209	0.109472	2.92761	709.283	242.274	432.317	266.35	851.741	144.744	173.731	338.342	1916.88	1550.16	188.597	209.392	323.111	141.948	131.957	264.952	346.134	275.371	306.611	219.583	257.358
PC(22:5(4Z,7Z,10Z,13Z,16Z)/0:0)	1.73637	C04230	red	rno05231|rno00564	Choline metabolism in cancer|Glycerophospholipid metabolism	11.49_614.3439m/z	614.344	11.4851	neg	LMGP01050142	Lipids and lipid-like molecules	Glycerophospholipids	Glycerophosphocholines	M+FA-H	C30H52NO7P	50.9	63.4	-4.30474	1.42595	0.0323041	0.105237	3.33196	467.376	140.271	291.58	162.985	515.047	89.6489	118.962	194.33	1336.28	1030.17	131.972	157.604	212.1	94.8085	78.4891	150.569	175.713	149.44	143.073	106.864	142.344
LysoPC(20:2(11Z,14Z))	-0.451179	C04230	blue	rno05231|rno00564	Choline metabolism in cancer|Glycerophospholipid metabolism	12.00_592.3606m/z	592.361	12.0029	neg	HMDB0010392	Lipids and lipid-like molecules	Glycerophospholipids	Glycerophosphocholines	M+FA-H	C28H54NO7P	51.9	66.4	-2.52843	1.8603	0.0222187	0.0823977	0.731445	1473.23	2014.14	2332.35	1572.61	1884.67	1313.13	1407.88	1204.18	1255.33	815.715	1974.59	1463.15	3131.41	1893.15	1711.54	1857.11	2483.51	1871.64	2097.09	2105.8	1566.57
PC(20:4(8Z,11Z,14Z,17Z)/0:0)	0.637869	C04230	red	rno05231|rno00564	Choline metabolism in cancer|Glycerophospholipid metabolism	10.74_588.3302m/z	588.33	10.7433	neg	LMGP01050140	Lipids and lipid-like molecules	Glycerophospholipids	Glycerophosphocholines	M+FA-H	C28H50NO7P	53.3	67.7	-0.848137	5.64975	4.4595e-06	0.00037425	1.55603	8855.09	5690.83	10556.6	7884.58	9958.93	6905.77	7916.01	9485.11	9431.88	8701.85	5401.92	5527.15	6822.78	5027.33	4436.46	6235.09	5485.66	7475.82	5270.44	5885.2	5031.23
LysoPC(22:6(4Z,7Z,10Z,13Z,16Z,19Z))	0.450306	C04230	red	rno05231|rno00564	Choline metabolism in cancer|Glycerophospholipid metabolism	10.74_612.3295m/z	612.329	10.7433	neg	HMDB0010404	Lipids and lipid-like molecules	Glycerophospholipids	Glycerophosphocholines	M+FA-H	C30H50NO7P	49.3	51.7	-2.12583	1.61282	0.00631963	0.0388454	1.36633	1339.09	980.067	1663.73	1317.33	1842.65	932.933	1084.68	1313.43	1242.4	1315.6	942.317	1105.97	1414.09	969.678	791.229	987.334	990.509	1176.45	724.749	1015.71	662.71
PC(18:3(9Z,12Z,15Z)/18:1(11Z))	0.826208	C00157	red	rno00591|rno05231|rno00564|rno04723|rno00592|rno00590	Linoleic acid metabolism|Choline metabolism in cancer|Glycerophospholipid metabolism|Retrograde endocannabinoid signaling|alpha-Linolenic acid metabolism|Arachidonic acid metabolism	14.13_804.5490m/z	804.549	14.129	pos	LMGP01012178	Lipids and lipid-like molecules	Glycerophospholipids	Glycerophosphocholines	M+Na	C44H80NO8P	43.1	32	-3.01849	3.33544	0.0397281	0.120201	1.77302	4773.26	2692.17	1115.05	2831.79	2021.73	7439.25	5765.58	7308.91	4464.58	7239.2	706.28	2114.72	3072.16	2488.6	1707.71	2537.8	2115.05	4568.25	5755.74	3735.64	811.847
PC(18:1(11Z)/16:0)	1.19295	C00157	red	rno00591|rno05231|rno00564|rno04723|rno00592|rno00590	Linoleic acid metabolism|Choline metabolism in cancer|Glycerophospholipid metabolism|Retrograde endocannabinoid signaling|alpha-Linolenic acid metabolism|Arachidonic acid metabolism	14.43_782.5676m/z	782.568	14.4282	pos	HMDB0008067	Lipids and lipid-like molecules	Glycerophospholipids	Glycerophosphocholines	M+Na	C42H82NO8P	39.5	11.1	0.7485	36.8438	0.000720075	0.0109925	2.2862	299276	130905	137740	218708	164187	433124	357347	389180	270023	423897	69175.5	209157	117834	145641	128115	120137	105056	208226	215059	84242	37314
PC(18:1(11Z)/18:0)	0.74364	C00157	red	rno00591|rno05231|rno00564|rno04723|rno00592|rno00590	Linoleic acid metabolism|Choline metabolism in cancer|Glycerophospholipid metabolism|Retrograde endocannabinoid signaling|alpha-Linolenic acid metabolism|Arachidonic acid metabolism	11.44_810.5986m/z	810.599	11.436	pos	HMDB0008069	Lipids and lipid-like molecules	Glycerophospholipids	Glycerophosphocholines	M+Na	C44H86NO8P	39	0	0.397733	8.3508	0.000435333	0.00796679	1.67439	20453.5	12215.5	14181.2	15752.9	13799.2	22768.5	21674.2	24017.1	25010.1	26425	9130.25	13601	9886.5	15988.1	14639.4	12906.8	11275.1	17031.3	11648.9	5984.43	12278.4
PC(14:0/22:5(7Z,10Z,13Z,16Z,19Z))	-0.58114	C00157	blue	rno00591|rno05231|rno00564|rno04723|rno00592|rno00590	Linoleic acid metabolism|Choline metabolism in cancer|Glycerophospholipid metabolism|Retrograde endocannabinoid signaling|alpha-Linolenic acid metabolism|Arachidonic acid metabolism	15.10_779.5429n	780.55	15.1018	pos	LMGP01012131	Lipids and lipid-like molecules	Glycerophospholipids	Glycerophosphocholines	M+H, M+Na	C44H78NO8P	43.7	37.3	-4.6593	2.175	0.0296068	0.0991002	0.668435	1675.19	2506.14	2211.96	615.756	1298.88	1756.55	1747.48	2113.18	1878.54	1779.2	2217.63	990.937	1384.12	3121.03	2737.5	2406.36	3534.23	2084.39	2713.96	4067.37	2310.02
PC(18:1(11Z)/18:1(11Z))	0.440895	C00157	red	rno00591|rno05231|rno00564|rno04723|rno00592|rno00590	Linoleic acid metabolism|Choline metabolism in cancer|Glycerophospholipid metabolism|Retrograde endocannabinoid signaling|alpha-Linolenic acid metabolism|Arachidonic acid metabolism	11.90_785.5917n	786.599	11.8994	pos	HMDB0008070	Lipids and lipid-like molecules	Glycerophospholipids	Glycerophosphocholines	M+H, M+Na	C44H84NO8P	40.7	13.4	-2.21166	4.95841	0.0366747	0.1142	1.35745	18197.1	13405.4	11030.5	10998.5	14968.3	22995.1	25959.3	22614.3	18221.6	18789.1	16851.9	18748.4	10525.2	17547.2	11236.7	11021.8	10162.2	11243.1	17652.5	14055.4	8414.78
PC(22:5(4Z,7Z,10Z,13Z,16Z)/22:5(4Z,7Z,10Z,13Z,16Z))	0.902761	C00157	red	rno00591|rno05231|rno00564|rno04723|rno00592|rno00590	Linoleic acid metabolism|Choline metabolism in cancer|Glycerophospholipid metabolism|Retrograde endocannabinoid signaling|alpha-Linolenic acid metabolism|Arachidonic acid metabolism	11.26_904.5846m/z	904.585	11.2589	pos	HMDB0008680	Lipids and lipid-like molecules	Glycerophospholipids	Glycerophosphocholines	M+Na	C52H84NO8P	35.3	0.00169	2.16412	2.35505	1.94988e-05	0.00102242	1.86964	1250.56	668.878	910.095	1110.45	1046.66	1306.46	1303.8	1469.06	1356.94	1501.02	994.841	1088.39	455.947	810.561	517.564	578.552	450.679	752.866	636.31	586.956	484.985
PC(22:6(4Z,7Z,10Z,13Z,16Z,19Z)/22:4(7Z,10Z,13Z,16Z))	0.804681	C00157	red	rno00591|rno05231|rno00564|rno04723|rno00592|rno00590	Linoleic acid metabolism|Choline metabolism in cancer|Glycerophospholipid metabolism|Retrograde endocannabinoid signaling|alpha-Linolenic acid metabolism|Arachidonic acid metabolism	12.57_904.5837m/z	904.584	12.574	pos	HMDB0008745	Lipids and lipid-like molecules	Glycerophospholipids	Glycerophosphocholines	M+Na	C52H84NO8P	40.1	15.6	1.18204	1.89526	3.23893e-05	0.00145752	1.74676	905.416	518.341	706.005	859.172	759.079	926.972	962.911	999.544	1006.91	1022.73	784.416	830.835	357.424	607.519	384.949	400.852	447.446	588.811	469.164	484.617	345.713
PC(20:5(5Z,8Z,11Z,14Z,17Z)/16:0)	-0.673552	C00157	blue	rno00591|rno05231|rno00564|rno04723|rno00592|rno00590	Linoleic acid metabolism|Choline metabolism in cancer|Glycerophospholipid metabolism|Retrograde endocannabinoid signaling|alpha-Linolenic acid metabolism|Arachidonic acid metabolism	14.43_779.5428n	780.55	14.4282	pos	HMDB0008495	Lipids and lipid-like molecules	Glycerophospholipids	Glycerophosphocholines	M+H, M+Na	C44H78NO8P	43.9	37	-4.72582	3.79237	0.0156716	0.0661834	0.626961	3831.51	6111.24	4155.19	2502.62	4168.23	3957.6	3535.37	4288.1	4000.21	4044.75	7050.85	2392.55	3418.82	8548.6	5651.31	5949.18	6819.37	4676.09	6428.8	10913.9	5374.13
PC(20:3(8Z,11Z,14Z)/18:3(9Z,12Z,15Z))	-0.588628	C00157	blue	rno00591|rno05231|rno00564|rno04723|rno00592|rno00590	Linoleic acid metabolism|Choline metabolism in cancer|Glycerophospholipid metabolism|Retrograde endocannabinoid signaling|alpha-Linolenic acid metabolism|Arachidonic acid metabolism	14.94_828.5489m/z	828.549	14.9373	pos	LMGP01011881	Lipids and lipid-like molecules	Glycerophospholipids	Glycerophosphocholines	M+Na	C46H80NO8P	38.4	33.4	-3.02816	2.16141	0.00907344	0.0479727	0.664975	1312.26	1973.4	1183.68	1566.11	821.368	1215.76	1725.4	1137.38	1602.86	1245.54	1909.3	1768.25	1616.21	2343.67	1390.85	2436.99	2646.1	1996.49	1605.97	2970.17	1023.38
PC(22:5(4Z,7Z,10Z,13Z,16Z)/22:5(7Z,10Z,13Z,16Z,19Z))	0.936073	C00157	red	rno00591|rno05231|rno00564|rno04723|rno00592|rno00590	Linoleic acid metabolism|Choline metabolism in cancer|Glycerophospholipid metabolism|Retrograde endocannabinoid signaling|alpha-Linolenic acid metabolism|Arachidonic acid metabolism	17.45_904.5862m/z	904.586	17.4483	pos	HMDB0008681	Lipids and lipid-like molecules	Glycerophospholipids	Glycerophosphocholines	M+Na	C52H84NO8P	37.1	0.11	4.03385	1.00202	2.76596e-07	5.74742e-05	1.91331	208.351	108.895	170.321	177.692	169.863	242.187	239.288	237.146	211.182	219.13	142.517	141.7	82.2471	109.334	97.8952	100.738	96.759	98.3868	116.703	131.473	80.0963
PC(20:3(5Z,8Z,11Z)/18:3(9Z,12Z,15Z))	-0.714512	C00157	blue	rno00591|rno05231|rno00564|rno04723|rno00592|rno00590	Linoleic acid metabolism|Choline metabolism in cancer|Glycerophospholipid metabolism|Retrograde endocannabinoid signaling|alpha-Linolenic acid metabolism|Arachidonic acid metabolism	15.10_828.5486m/z	828.549	15.1018	pos	LMGP01012201	Lipids and lipid-like molecules	Glycerophospholipids	Glycerophosphocholines	M+Na	C46H80NO8P	39.9	36.8	-3.41256	1.99329	0.0061918	0.0384127	0.609411	861.746	1414.06	810.047	906.489	525.86	743.882	1137.78	799.315	1145.76	824.836	1141.5	1268.4	1093.02	1652.25	1083.46	1666.53	2349.84	1357.14	1054.36	2048.56	839.632
PC(20:4(5Z,8Z,11Z,14Z)/18:0)	0.980423	C00157	red	rno00591|rno05231|rno00564|rno04723|rno00592|rno00590	Linoleic acid metabolism|Choline metabolism in cancer|Glycerophospholipid metabolism|Retrograde endocannabinoid signaling|alpha-Linolenic acid metabolism|Arachidonic acid metabolism	11.25_854.5897m/z	854.59	11.2475	neg	HMDB0008431	Lipids and lipid-like molecules	Glycerophospholipids	Glycerophosphocholines	M+FA-H	C46H84NO8P	51.5	63.7	-2.4339	5.21073	0.00526514	0.0347175	1.97304	7348.02	3724.2	5056.35	12792.1	6681.54	4786.28	3813.13	6077.19	7682.48	11895.1	6885.31	5648.61	2935.64	4604.02	1327.41	2620.89	3203.08	4080.5	4032.38	3006.96	2621.44
1-heptadecanoyl-sn-glycero-3-phosphocholine	-0.672397					12.67_509.3474n	510.355	12.672	pos	24068	Lipids and lipid-like molecules	Glycerophospholipids	Glycerophosphocholines	M+H, M+Na	C25H52NO7P	54	74.2	-1.43936	7.03965	0.0220326	0.0820863	0.627463	13747	21908.9	18850.3	12009.8	13321.4	17399.5	16074.2	13805.4	10992.3	7523.3	11943.7	13547.2	19739.5	11453.7	14418	24256	33994.8	27421.4	35827.5	25957.6	22438.5
PC(22:6(4Z,7Z,10Z,13Z,16Z,19Z)/0:0)	0.54791					10.88_612.3301m/z	612.33	10.88	neg	LMGP01050056	Lipids and lipid-like molecules	Glycerophospholipids	Glycerophosphocholines	M+FA-H	C30H50NO7P	45.5	30.5	-0.964323	4.39244	0.000197582	0.00487679	1.46197	6825.01	4668.38	6965.7	6807.92	8859.28	4915.7	5972.28	6760.04	6928.91	7390.26	5380.02	5453.7	6052.61	5095.09	3732.08	4683.04	4606.08	5061.92	3617.7	4475.81	3194.11
PC(19:0/0:0)	0.547977					13.39_582.3761m/z	582.376	13.3862	neg	LMGP01050041	Lipids and lipid-like molecules	Glycerophospholipids	Glycerophosphocholines	M+FA-H	C27H56NO7P	52.7	78.4	-2.81208	1.19237	0.00166612	0.0180696	1.46203	572.573	391.628	802.897	576.943	756.006	452.003	495.18	418.017	602.6	476.938	406.595	362.386	402.948	307.279	271.751	342.408	421.209	466.907	444.025	392.172	490.226
PC(17:0/0:0)	0.250072					12.60_508.3390m/z	508.339	12.5979	neg	LMGP01050024	Lipids and lipid-like molecules	Glycerophospholipids	Glycerophosphocholines	M-H	C25H52NO7P	45.1	33.7	-3.72918	1.70104	0.000333845	0.00674014	1.18927	2194.51	1845.26	2133.66	2129.96	2619.57	2088.65	2253.4	2137.6	2197.84	1995.37	1816.37	2070.63	1851.14	1914.86	1679.06	1935.54	1962.49	1845.17	1583.4	1989.54	1649.66
PE(20:1(11Z)/20:3(8Z,11Z,14Z))	-0.382036	C00350	blue	rno00564|rno04723|rno00563|rno04136|rno04140|rno05167	Glycerophospholipid metabolism|Retrograde endocannabinoid signaling|Glycosylphosphatidylinositol (GPI)-anchor biosynthesis|Autophagy - other|Autophagy - animal|Kaposi sarcoma-associated herpesvirus infection	11.66_840.5754m/z	840.575	11.6623	neg	LMGP02010862	Lipids and lipid-like molecules	Glycerophospholipids	Glycerophosphoethanolamines	M+FA-H	C45H82NO8P	43.3	20.9	-0.748482	2.47316	0.046884	0.133628	0.767354	3527.17	4596.54	3883.24	3684.32	3253.23	3324.96	4396.96	3911.72	3691.48	2071.48	4214.6	2358.97	5101.81	3241.71	3609.21	5527.36	6953.76	5491	4151.57	5398.7	4513.26
PE(20:3(8Z,11Z,14Z)/18:0)	0.477323	C00350	red	rno00564|rno04723|rno00563|rno04136|rno04140|rno05167	Glycerophospholipid metabolism|Retrograde endocannabinoid signaling|Glycosylphosphatidylinositol (GPI)-anchor biosynthesis|Autophagy - other|Autophagy - animal|Kaposi sarcoma-associated herpesvirus infection	11.68_814.5599m/z	814.56	11.6759	neg	HMDB0009354	Lipids and lipid-like molecules	Glycerophospholipids	Glycerophosphoethanolamines	M+FA-H	C43H80NO8P	31.2	26.3	-0.59751	1.43598	0.0333214	0.107048	1.39216	1255.85	902.09	1165.07	1900.19	1043.07	1385.87	774.923	1216.08	1398.31	1163.3	1107.08	1633.18	677.856	1230.01	419.826	831.92	621.471	838.9	716.029	918.888	927.836
PE(18:1(9Z)/18:0)	-0.899458	C00350	blue	rno00564|rno04723|rno00563|rno04136|rno04140|rno05167	Glycerophospholipid metabolism|Retrograde endocannabinoid signaling|Glycosylphosphatidylinositol (GPI)-anchor biosynthesis|Autophagy - other|Autophagy - animal|Kaposi sarcoma-associated herpesvirus infection	11.28_790.5598m/z	790.56	11.2818	neg	LMGP02010050	Lipids and lipid-like molecules	Glycerophospholipids	Glycerophosphoethanolamines	M+FA-H	C41H80NO8P	44	38.5	-0.725871	1.26904	0.00559612	0.0361098	0.536088	259.223	483.546	146.589	229.325	139.425	241.898	377.544	270.792	449.407	218.804	320.394	355.69	441.383	565.499	336.115	779.015	819.359	487.003	388.202	517.602	308.74
LysoPE(18:2(9Z,12Z)/0:0)	-1.98838					11.37_477.2847n	478.292	11.3679	pos	62292	Lipids and lipid-like molecules	Glycerophospholipids	Glycerophosphoethanolamines	M+H, 2M+H, M+Na, M+H-H2O	C23H44NO7P	48.6	50.8	-1.79867	3.93845	3.63888e-05	0.00156174	0.252022	551.713	2189.15	1044.11	763.95	776.219	505.308	255.872	474.256	410.373	183.617	1293.64	1971.07	3365.26	2894.88	1672.05	1719.32	2104.01	1325.77	2058.17	3695.98	1980.45
PE(22:4(7Z,10Z,13Z,16Z)/19:0)	0.92948					12.27_854.5898m/z	854.59	12.2736	neg	LMGP02011119	Lipids and lipid-like molecules	Glycerophospholipids	Glycerophosphoethanolamines	M+FA-H	C46H84NO8P	50.5	60.9	-2.24761	11.2782	0.0056407	0.0362546	1.90459	35889.6	18843.7	30079.2	61671.3	33663	20156.2	21517.3	27189.2	35385.3	57454.8	29381	32684.5	16050	23609.3	5956.85	15204.9	15533.7	20443.4	20256.2	16315.1	11846.2
PE(19:0/22:4(7Z,10Z,13Z,16Z))	1.02778					10.84_854.5897m/z	854.59	10.839	neg	LMGP02010791	Lipids and lipid-like molecules	Glycerophospholipids	Glycerophosphoethanolamines	M+FA-H	C46H84NO8P	50.9	69.7	-2.42136	7.48177	0.00534729	0.0350877	2.03889	14601.5	7161.5	10225.6	26080.8	14261.1	9571.27	6608.49	12170.3	13647.4	24247	12933.4	10466.8	5649.83	8943.32	2430.29	4881.09	6003.42	8730.63	7801.9	6032.43	4903.35
PE(20:4(5Z,8Z,11Z,14Z)/21:0)	1.00335					11.55_854.5899m/z	854.59	11.5534	neg	LMGP02010956	Lipids and lipid-like molecules	Glycerophospholipids	Glycerophosphoethanolamines	M+FA-H	C46H84NO8P	50.3	58.4	-2.21501	5.5706	0.00305588	0.0258443	2.00465	7916.78	3949.21	5576.7	13056.9	6894.89	5417.88	4537.14	6588.03	8311.35	12951.3	7030.07	6184.95	3154.01	4942.09	1380.95	3021.24	3421.08	4365.22	4063.1	3228.31	2650.35
LysoPE(16:0/0:0)	-1.23531					11.17_453.2845n	452.277	11.1654	neg	HMDB0011503	Lipids and lipid-like molecules	Glycerophospholipids	Glycerophosphoethanolamines	M-H, 2M-H	C21H44NO7P	43.1	18.9	-2.30646	5.09337	0.000327483	0.0067241	0.424752	2227.94	5245.26	3570.85	2226.02	4014.13	1703.41	1208.85	2348.99	1773.37	977.856	3215.23	4764.69	7001.63	5703.29	5299.97	4106.08	6284.61	3528.35	4099.2	8866.7	4828.05
LysoPE(22:6(4Z,7Z,10Z,13Z,16Z,19Z)/0:0)	-1.47763					10.78_524.2779m/z	524.278	10.7843	neg	HMDB0011526	Lipids and lipid-like molecules	Glycerophospholipids	Glycerophosphoethanolamines	M-H	C27H44NO7P	43.1	24.2	-0.674966	2.4371	0.000103212	0.00321637	0.359077	364.888	1016.18	522.005	383.31	589.592	260.482	186.85	404.657	348.235	223.975	577.779	818.648	1632.88	1151.55	1102.1	767.687	1217.28	828.647	771.768	1547.38	762.298
LysoPE(20:4(5Z,8Z,11Z,14Z)/0:0)	-1.30592					10.81_500.2770m/z	500.277	10.8116	neg	HMDB0011517	Lipids and lipid-like molecules	Glycerophospholipids	Glycerophosphoethanolamines	M-H	C25H44NO7P	47.9	44.1	-2.52122	3.76665	0.000119002	0.00353488	0.404463	1073.08	2653.1	1577.81	1113.42	1485.85	839.312	618.222	1219.4	1148.49	582.162	1473.52	1953.38	4111.6	2444.69	2387.49	2479.45	3121.54	1926.23	2372.14	4073.39	2840.69
LysoPE(0:0/16:1(9Z))	-0.565186					2.53_490.2318m/z	490.232	2.52942	pos	HMDB0011474	Lipids and lipid-like molecules	Glycerophospholipids	Glycerophosphoethanolamines	M+K	C21H42NO7P	36.6	0	-2.74105	1.06881	0.0127524	0.058769	0.675868	366.39	542.103	389.526	311.649	363.569	610.147	363.482	529.407	195.387	167.955	367.43	396.354	570.136	534.863	483.688	738.712	507.476	417.924	646.227	578.623	721.701
PE(22:6(4Z,7Z,10Z,13Z,16Z,19Z)/0:0)	-1.44712					11.37_526.2915m/z	526.291	11.3679	pos	LMGP02050013	Lipids and lipid-like molecules	Glycerophospholipids	Glycerophosphoethanolamines	M+H	C27H44NO7P	42.8	30.9	-2.56688	2.46317	0.000287845	0.00614935	0.366753	401.553	1094.89	517.814	446.144	572.356	378.376	230.398	421.091	385.68	260.563	541.572	716.116	1447.75	1137.62	1165.33	908.348	1528.49	852.94	934.872	1978.93	831.769
1-Heptadecanoylglycerophosphoethanolamine	-0.574565					10.12_512.2982m/z	512.298	10.1164	neg	HMDB0061691	Lipids and lipid-like molecules	Glycerophospholipids	Glycerophosphoethanolamines	M+FA-H	C22H46NO7P	49.4	51.3	-2.55847	2.76882	0.0372835	0.115381	0.671489	2690.75	4007.14	4090.5	1991.38	4086.17	3376.2	2048.66	1889.08	2384.01	1659.96	2141.75	2757.9	5581.94	2952.21	3873.85	3669.62	4333.19	4077.39	5024.11	6879.72	2786.79
LysoPE(18:0/0:0)	-1.15087					11.81_462.2973m/z	462.297	11.8121	neg	HMDB0011130	Lipids and lipid-like molecules	Glycerophospholipids	Glycerophosphoethanolamines	M-H2O-H	C23H48NO7P	33.9	16.8	-3.44775	2.64619	0.000451894	0.00813544	0.450353	670.255	1488.29	695.653	912.577	602.791	703.564	659.867	632.671	815.913	339.004	914.486	959.408	1380.01	1184.72	1204	1520.95	2356.05	1386.33	1274.19	2461.33	1729.7
PE(P-16:0/0:0)	-1.76383					12.16_437.2889n	438.296	12.1582	pos	LMGP02070001	Lipids and lipid-like molecules	Glycerophospholipids	Glycerophosphoethanolamines	M+H, M+Na	C21H44NO6P	42.9	25.9	-3.91641	2.47901	0.000819855	0.0119122	0.294466	316.238	1073.94	387.407	404.086	345.338	408.189	274.152	403.592	220.165	86.9766	608.176	525.606	779.502	642.35	733.232	1229.04	1807.24	962.244	1153.92	2142.52	1229.5
LysoPE(0:0/18:4(6Z,9Z,12Z,15Z))	0.640475					3.55_473.2565n	945.49	3.55058	neg	HMDB0011480	Lipids and lipid-like molecules	Glycerophospholipids	Glycerophosphoethanolamines	M-H, 2M-H	C23H40NO7P	43.5	35.8	4.76484	1.07007	0.0433656	0.126723	1.55884	609.401	390.932	522.031	543.324	414.348	1166.53	428.701	715.134	503.019	582.121	284.868	347.878	735.639	372.512	271.719	384.45	417.071	258.58	350.783	120.908	755.842
1-(6-[3]-ladderane-hexanoyl)-2-(8-[3]-ladderane-octanyl)-sn-glycerophosphoethanolamine	0.825852					16.39_763.5365m/z	763.537	16.3939	pos	LMGP02080008	Lipids and lipid-like molecules	Glycerophospholipids	Glycerophosphoethanolamines	M+NH4	C43H72NO7P	30	0	-2.6153	1.12007	0.000728485	0.0110649	1.77258	353.106	199.204	201.335	265.047	208.271	387.718	431.217	413.354	458.371	459.532	228.788	221.533	104.552	184.049	277.387	255.68	197.329	154.903	166.585	166.114	234.328
PE(O-18:1(9Z)/0:0)	-0.586941					12.71_464.3125m/z	464.312	12.7058	neg	LMGP02060004	Lipids and lipid-like molecules	Glycerophospholipids	Glycerophosphoethanolamines	M-H	C23H48NO6P	35.6	31.3	-4.63489	1.15087	0.0106688	0.0529109	0.665753	384.6	577.691	265.066	562.297	292.603	395.516	380.544	383.411	520.776	276.585	403.72	537.595	446.217	591.974	418.209	532.228	883.231	508.47	468.904	813.317	750.74
LysoPE(0:0/18:2(9Z,12Z))	-1.28199					11.16_478.2950m/z	478.295	11.1631	pos	HMDB0011477	Lipids and lipid-like molecules	Glycerophospholipids	Glycerophosphoethanolamines	M+H	C23H44NO7P	48.6	57.9	4.58044	1.02497	9.50735e-06	0.000629992	0.411227	74.5256	181.228	85.6591	84.7909	71.8815	75.0173	64.6863	70.7817	76.8954	66.4927	165.456	192.631	264.077	238.003	136.613	147.545	150.28	137.561	171.673	249.193	140.47
LysoPE(0:0/20:4(5Z,8Z,11Z,14Z))	-1.10561					10.65_500.2764m/z	500.276	10.6477	neg	HMDB0011487	Lipids and lipid-like molecules	Glycerophospholipids	Glycerophosphoethanolamines	M-H	C25H44NO7P	39.1	15.5	-3.62503	1.60267	6.59835e-05	0.00229989	0.464705	245.836	529.015	276.86	281.074	253.415	196.285	169.524	258.643	311.431	219.459	309.844	379.616	591.822	458.925	644.398	477.055	592.57	397.072	481.369	783.017	703.482
PG(P-20:0/16:1(9Z))	-2.26391					9.18_805.5610m/z	805.561	9.1794	neg	LMGP04030063	Lipids and lipid-like molecules	Glycerophospholipids	Glycerophosphoglycerols	M+FA-H	C42H81O9P	39.2	0.0352	1.30972	2.30556	0.00229793	0.0217357	0.208206	184.933	888.218	304.795	246.235	398.087	84.9467	138.496	51.1164	100.181	155.604	555.088	308.941	1064.16	90.2402	1468.03	892.549	1446.18	107.926	1021.82	1460.78	1354.68
PI(20:4(5Z,8Z,11Z,14Z)/18:1(9Z))	1.3214	C00626	red			11.88_883.5338m/z	883.534	11.8804	neg	HMDB0009896	Lipids and lipid-like molecules	Glycerophospholipids	Glycerophosphoinositols	M-H	C47H81O13P	36.6	0	-0.436171	1.8748	1.34224e-07	3.85416e-05	2.49909	572.134	228.937	419.126	680.66	561.823	523.724	564.88	552.865	642.506	631.491	221.081	379.554	204.379	398.512	147.129	167.196	117.23	246.874	228.44	236.797	171.118
PI(20:3(5Z,8Z,11Z)/20:3(5Z,8Z,11Z))	0.801545	C00626	red			12.10_909.5470m/z	909.547	12.0979	neg	HMDB0009884	Lipids and lipid-like molecules	Glycerophospholipids	Glycerophosphoinositols	M-H	C49H83O13P	33.9	0	-3.18297	1.27573	0.000290154	0.00618242	1.74297	466.69	267.756	328.438	643.111	299.769	449.224	543.283	462.48	560.178	447.038	213.267	308.812	166.712	166.674	186.016	264.438	306.714	400.063	329.075	323.194	280.353
PI(16:0/18:0)	-1.09439	C00626	blue			8.96_837.5495m/z	837.549	8.96208	neg	HMDB0009781	Lipids and lipid-like molecules	Glycerophospholipids	Glycerophosphoinositols	M-H	C43H83O13P	39.3	0	-0.451644	2.59291	0.0159158	0.0668097	0.468333	941.228	2009.74	1581.58	1350.38	2355.8	986.686	255.859	460.214	343.173	196.131	1472.43	1583.21	2651.02	1152.46	3030.65	1477.63	2988.35	118.153	2630.7	2473.94	2528.59
PI(18:0/20:4(5Z,8Z,11Z,14Z))	0.817389	C00626	red			17.14_885.5490m/z	885.549	17.1442	neg	LMGP06010010	Lipids and lipid-like molecules	Glycerophospholipids	Glycerophosphoinositols	M-H	C47H83O13P	40.7	14	-0.987822	3.21588	0.000559958	0.00932748	1.76221	2801.54	1589.79	2824.42	4068.8	1732.04	1550.64	2439.26	2782.5	3369.28	3645.42	1957.15	1901.31	1118.81	1712.39	1211.03	1275.04	1545.46	1982.26	1849.16	1521.41	1413.62
PI(20:4(5Z,8Z,11Z,14Z)/18:0)	0.979377	C00626	red			11.87_885.5481m/z	885.548	11.8667	neg	LMGP06010598	Lipids and lipid-like molecules	Glycerophospholipids	Glycerophosphoinositols	M-H	C47H83O13P	37.4	8.8	-1.92464	6.97417	6.29666e-05	0.00223346	1.97161	10511.7	5331.5	9745.28	13386.8	10092.2	7240.44	7667.48	8439.15	13527.1	13994.8	7122.08	7163.04	3401.51	5540.8	4002.35	3861.46	3736.44	6592.98	6799.75	6274.94	4151.16
PI(18:1(9Z)/20:3(8Z,11Z,14Z))	1.13195	C00626	red			11.25_885.5489m/z	885.549	11.2475	neg	HMDB0009843	Lipids and lipid-like molecules	Glycerophospholipids	Glycerophosphoinositols	M-H	C47H83O13P	33.4	6.96	-1.1119	2.85583	4.90877e-05	0.00190079	2.19155	1582.84	722.245	1235.53	2205.65	1723.78	1011.8	1072.31	1385.29	1977.63	2050.67	1039.34	1058.46	490.313	724.69	518.306	500.304	480.708	841.54	922.549	739.788	628.698
1-arachidonoyl-sn-glycero-3-phospho-1D-myo-inositol	0.73896					10.77_619.2872m/z	619.287	10.7706	neg	HMDB0062722	Lipids and lipid-like molecules	Glycerophospholipids	Glycerophosphoinositols	M-H	C29H49O12P	43	23.2	-2.66912	1.57085	0.000459567	0.00819878	1.66897	751.736	450.419	645.724	482.518	660.593	704.94	876.145	838.08	988.548	817.342	270.472	244.656	463.626	280.392	375.215	438.136	555.54	547.824	636.017	644.803	497.925
PI(O-18:0/20:5(5Z,8Z,11Z,14Z,17Z))	-0.882859					8.98_870.5623n	851.544	8.97558	neg	LMGP06020086	Lipids and lipid-like molecules	Glycerophospholipids	Glycerophosphoinositols	M-H2O-H, M+FA-H	C47H83O12P	37.3	8.44	0.124747	1.18011	0.0352239	0.110943	0.542292	298.821	551.034	550.236	339.104	786.477	338.518	80.8078	134.261	120.833	40.3326	493.483	512.424	695.552	365.549	738.947	429.277	730.706	31.1991	759.254	615.101	689.882
PS(O-20:0/18:3(9Z,12Z,15Z))	0.652159					11.42_782.5673m/z	782.567	11.4224	pos	LMGP03020055	Lipids and lipid-like molecules	Glycerophospholipids	Glycerophosphoserines	M+H-H2O	C44H82NO9P	43.4	31.3	-2.71769	8.03378	0.0257669	0.0905975	1.57152	33387.4	21245.3	6221.79	31346.1	27703	30484.2	50487.5	41398.4	41630.4	37828.3	7645.65	18760.3	21792	26705.4	18945.7	23868	23607.9	21374.6	33841	30941.7	6216.54
PS(21:0/22:6(4Z,7Z,10Z,13Z,16Z,19Z))	1.66886					14.05_877.5789n	922.576	14.0489	neg	LMGP03010004	Lipids and lipid-like molecules	Glycerophospholipids	Glycerophosphoserines	M-H, M+FA-H	C49H84NO10P	39.6	23.6	-4.93921	4.07702	2.1909e-05	0.00110097	3.17963	2508.8	789.021	2126.93	3505.61	2268.27	850.473	2266.92	2296.27	3339.72	3416.19	1201.48	1666.48	627.435	465.692	345.346	837.253	567.89	937.239	737.534	702.118	590.76
1-(2-methoxy-6Z-heptadecenyl)-sn-glycero-3-phosphoserine	1.48553					13.08_506.2868m/z	506.287	13.082	neg	LMGP03060015	Lipids and lipid-like molecules	Glycerophospholipids	Glycerophosphoserines	M-H2O-H	C24H48NO9P	37.7	6.28	-3.82863	1.81807	0.00090332	0.0127416	2.8002	627.848	224.215	1218.02	735.935	835.627	467.177	515.151	417.142	340.754	492.98	226.564	230.485	160.186	536.148	199.478	404.381	209.3	288.72	84.0494	58.1558	68.9031
1-Oleoylglycerophosphoserine	0.95594					11.76_504.2718m/z	504.272	11.7574	neg	HMDB0061694	Lipids and lipid-like molecules	Glycerophospholipids	Glycerophosphoserines	M-H2O-H	C24H46NO9P	40.7	14.3	-2.71087	1.73227	0.0235789	0.0856257	1.93984	1025.18	528.485	2174.52	1215.77	1330.97	963.26	658.903	600.307	610.329	647.366	472.778	468.493	634.955	1227.34	511.984	886.238	401.209	690.332	193.909	141.713	184.386
4-Phosphopantothenoylcysteine	0.770625					6.01_401.0770m/z	401.077	6.00777	neg	HMDB0001117	Organic acids and derivatives	Peptidomimetics	Hybrid peptides	M-H	C12H23N2O9PS	41.6	22.9	-4.74078	2.40674	0.000520974	0.00891198	1.70601	1699.13	995.968	1336.79	2341.67	1477.33	1448.42	1655.03	1621.72	1989.1	1722.97	1363.06	1908.15	793.144	1241.24	770.82	862.133	692.794	982.353	887.581	774.96	679.403
2-Hydroxycinnamic acid	-0.536732	C01772	blue	rno00360	Phenylalanine metabolism	1.80_164.0473n	182.081	1.7973	pos	306	Phenylpropanoids and polyketides	Cinnamic acids and derivatives	Hydroxycinnamic acids and derivatives	M+H, M+NH4, M+H-H2O	C9H8O3	53.3	67.3	-0.359273	3.97179	5.18578e-05	0.0019483	0.68933	3776.67	5478.75	4038.13	3071.26	3998.85	4784.17	3637.17	3973.74	3521.69	3188.32	5379.47	4509.57	5611.31	5882.89	5120.32	5592.61	4357.69	5622.66	6785.7	6562.28	4841.72
Equol 4'-O-glucuronide	-1.21695					4.96_418.1264n	417.119	4.9645	neg	HMDB0041731	Phenylpropanoids and polyketides	Isoflavonoids	Isoflavonoid O-glycosides	M-H, 2M-H	C21H22O9	49.2	48.6	0.0880831	2.69394	0.0261641	0.0914078	0.43019	948.241	2204.24	1354.76	1257.57	1674.74	1248.87	784.288	847.072	129.974	288.641	1035.81	974.765	1144.46	619.032	4373.54	2442.33	3730	1310.68	1666.38	2768.97	4180.64
7-(4-Hydroxyphenyl)-1-phenyl-4-hepten-3-one	1.42831					3.10_583.2815m/z	583.281	3.10072	pos	HMDB0033295	Phenylpropanoids and polyketides	Diarylheptanoids	Linear diarylheptanoids	2M+Na	C19H20O2	38.6	0	-0.691217	1.04842	0.00599964	0.0377639	2.69132	247.909	92.1145	99.2438	131.674	115.521	505.962	120.359	278.321	327.293	404.901	42.3088	57.3481	193.004	100.627	58.1397	95.7685	102.813	46.6207	81.1591	56.412	179.059
13(S)-HODE	-0.958441	C14762	blue	rno00591|rno03320	Linoleic acid metabolism|PPAR signaling pathway	11.27_295.2276m/z	295.228	11.2682	neg	45667	Lipids and lipid-like molecules	Fatty Acyls	Lineolic acids and derivatives	M-H	C18H32O3	52.1	69.2	-1.01434	1.65307	0.00775812	0.0438439	0.514613	402.701	782.532	242.112	289.214	223.082	421.885	729.765	401.648	742.732	171.171	607.353	545.614	763.883	926.714	501.638	1299.93	1306.57	715.596	616.922	896.102	427.534
9(S)-HpODE	-1.1451	C14827	blue	rno00591	Linoleic acid metabolism	11.07_312.2285n	311.222	11.0703	neg	36019	Lipids and lipid-like molecules	Fatty Acyls	Lineolic acids and derivatives	M-H2O-H, M-H	C18H32O4	45.1	33.1	-4.94378	2.47016	0.0138344	0.061743	0.452158	790.082	1747.36	1766.99	865.73	915.273	572.118	479.667	551.246	433.025	736.604	970.51	1074.46	2610.51	1073.79	2635.71	833.114	3281.36	633.322	1897.45	1595	2615.7
gamma-Linolenic Acid	-1.15723	C06426	blue	rno00591|rno01040	Linoleic acid metabolism|Biosynthesis of unsaturated fatty acids	13.10_278.2246n	277.217	13.0955	neg	386	Lipids and lipid-like molecules	Fatty Acyls	Lineolic acids and derivatives	M-H, 2M-H	C18H30O2	39.1	0.274	0.198356	2.18372	0.00829788	0.0456326	0.448371	553.661	1234.83	365.269	323.181	307.742	672.852	681.305	648.303	965.05	465.582	397.517	424.972	1115.15	1273.43	1288.94	1798.79	1804.72	1247.82	1132.43	2416.91	682.396
19(20)-EpDPE	-1.43922					12.24_327.2307m/z	327.231	12.2418	pos	HMDB0013620	Lipids and lipid-like molecules	Fatty Acyls	Lineolic acids and derivatives	M+H-H2O	C22H32O3	48.3	49.7	-3.3695	1.47841	0.00944253	0.0493115	0.368766	186.628	506.087	160.872	283.435	119.25	291.484	311.266	184.801	90.0967	51.816	280.445	162.602	372.871	245.496	305.303	800.408	1128.24	507.604	429.484	815.642	518.863
Dihydroergotamine	-2.63678	C07798	blue			7.24_582.2715m/z	582.271	7.23635	neg	HMDB0014465	Alkaloids and derivatives	Ergoline and derivatives	Lysergic acids and derivatives	M-H	C33H37N5O5	40	3.81	-1.20942	1.4946	3.33044e-06	0.000320754	0.160787	43.4157	270.021	21.7026	19.782	123.81	43.2691	29.2527	48.4455	32.3595	28.7045	267.791	151.936	320.935	357.146	276.427	154.392	209.764	345.943	354.944	151	379.95
Ergotamine	-1.81692	C07544	blue			6.50_580.2553m/z	580.255	6.49773	neg	HMDB0014834	Alkaloids and derivatives	Ergoline and derivatives	Lysergic acids and derivatives	M-H	C33H35N5O5	35.6	6.46	-2.06526	1.8365	0.000109524	0.00335583	0.283827	147.186	518.576	152.563	93.0172	215.968	243.505	143.144	182.11	104.133	43.0473	313.444	290.332	631.858	581.857	847.752	283.375	656.173	609.954	702.123	258.401	529.067
1-Octylglycerol	-2.10923					10.36_447.3079m/z	447.308	10.3559	pos	LMGL01020027	Lipids and lipid-like molecules	Glycerolipids	Monoradylglycerols	2M+K	C11H24O3	44.9	35.5	-0.791829	1.05748	0.00143386	0.016516	0.231771	42.9392	185.265	11.6919	37.9774	17.5444	5.23424	44.1347	42.7073	110.174	74.0495	116.987	106.502	87.5023	211.628	354.062	128.962	313.119	79.9271	234.768	298.935	105.528
(3S,6E)-Nerolidol	-1.65754	C09704	blue			10.09_239.1650m/z	239.165	10.0893	neg	HMDB0041629	Lipids and lipid-like molecules	Prenol lipids	Monoterpenoids	M+FA-H	C13H22O	39.8	1.39	-1.56857	1.28888	0.00914267	0.0482194	0.31698	119.509	377.024	34.2448	48.2616	48.8794	112.511	96.4799	170.019	280.435	165.24	114.797	76.1009	142.031	129.175	409.555	671.068	402.571	642.469	425.302	719.14	415.054
2-(Methoxycarbonyl)-5-methyl-2,4-bis(3-methyl-2-butenyl)-6-(2-methyl-1-oxopropyl)-5-(4-methyl-3-pentenyl)cyclohexanone	-2.65019					10.61_458.3376n	457.33	10.6067	neg	HMDB0035995	Lipids and lipid-like molecules	Prenol lipids	Monoterpenoids	M-H, 2M-H, M+FA-H, M-H2O-H	C29H46O4	39.3	5.97	-4.40211	1.63119	0.0492147	0.13771	0.159299	93.8648	589.238	157.38	182.569	50.0698	14.8676	95.3363	60.7845	73.5919	116.32	273.452	214.381	409.175	222.769	2013.65	341.583	1711.56	207.546	198.09	751.19	138.219
Sulfate	0.795641	C00059	red	rno00270|rno02010|rno00920|rno00230	Cysteine and methionine metabolism|ABC transporters|Sulfur metabolism|Purine metabolism	17.60_96.9600m/z	96.96	17.5958	neg	HMDB0001448	Homogeneous non-metal compounds	Non-metal oxoanionic compounds	Non-metal sulfates	M-H	H2O4S	50.6	60.4	-1.05891	2.29999	2.59718e-05	0.00126298	1.73585	1352.52	779.17	1342	1843.98	1371.68	1311.56	1116.06	1097.2	1515.46	1222.23	971.365	1225.5	700.234	982.555	657.187	660.058	640.923	729.351	760.539	663.358	579.795
9,10-DiHOME	-1.27706	C14828	blue	rno00591	Linoleic acid metabolism	11.69_313.2382m/z	313.238	11.6894	neg	LMFA02000229	Lipids and lipid-like molecules	Fatty Acyls	Octadecanoids	M-H	C18H34O4	46.1	41.4	-0.794917	1.21667	0.00132053	0.0157835	0.412636	132.65	321.471	137.137	155.614	60.6303	133.659	113.171	143.951	149.099	167.941	193.034	101.061	324.934	125.096	442.471	328.617	506.461	461.008	313.505	425.27	314.717
Treosulfan	0.755947	C19557	red			0.67_261.0108m/z	261.011	0.671533	pos	HMDB0042046	Organic acids and derivatives	Organic sulfonic acids and derivatives	Organosulfonic acids and derivatives	M+H-H2O	C6H14O8S2	36.6	0	3.77775	1.22468	0.00266054	0.0237725	1.68874	503.15	297.944	350.373	532.158	432.682	507.186	502.252	657.089	610.929	432.528	456.528	586.404	442.016	342.455	247.992	221.206	148.784	189.755	254.052	226.281	161.91
PHODiA-PE	1.01941					9.22_604.3242m/z	604.324	9.2204	neg	LMGP20020021	Lipids and lipid-like molecules	Glycerophospholipids	Oxidized glycerophospholipids	M-H2O-H	C29H54NO11P	39.3	4.56	-2.26083	1.45722	0.0138766	0.0617535	2.02709	676.336	333.648	909.081	1529.63	574.813	572.54	485.739	427.301	476.152	435.423	464.546	450.919	433.331	447.514	66.7351	503.387	225.511	454.6	222.704	174.66	226.224
Allodesmosine	0.60306					12.35_636.3473m/z	636.347	12.3545	neg	HMDB0040704	Organic acids and derivatives	Carboxylic acids and derivatives	Pentacarboxylic acids and derivatives	M-H2O-H	C30H51N6O10+	38.9	8.98	-2.26959	1.54254	7.30126e-08	2.59431e-05	1.51894	683.225	449.805	657.212	776.382	716.482	639.329	732.405	697.262	662.915	583.814	434.357	483.457	470.717	508.725	398.608	521.552	400.898	522.038	415.428	384.511	407.569
Pentasine	0.34294					11.62_634.3320m/z	634.332	11.6218	neg	HMDB0029803	Organic acids and derivatives	Carboxylic acids and derivatives	Pentacarboxylic acids and derivatives	M-H2O-H	C30H49N6O10+	37.1	1.15	-1.72671	1.27622	0.00683616	0.0407132	1.26834	1106.16	872.13	1230.8	1229.25	1405.84	919.634	969.915	1059.06	1052.06	982.697	974.772	1137.44	977.424	1116.47	779.584	770.249	703.964	801.578	875.782	817.162	639.011
(Z)-3-(pentadec-8-en-1-yl)phenol	-0.723328					13.44_283.2430m/z	283.243	13.4401	neg	LMPK15010007	Lipids and lipid-like molecules	Polyketides	Phenolic lipids	M-H2O-H	C21H34O	38.6	0	-0.3692	1.07102	0.0137378	0.0614789	0.605699	266.029	439.21	313.251	212.539	316.994	283.605	306.764	314.933	239.36	140.787	242.607	211.865	389.311	405.055	405.101	514.912	733.725	422.845	389.002	739.435	377.451
2-Phenylacetamide	-0.574714	C02505	blue	rno00360	Phenylalanine metabolism	1.28_135.0690n	180.067	1.28272	neg	HMDB0010715	Benzenoids	Benzene and substituted derivatives	Phenylacetamides	M+FA-H, 2M-H	C8H9NO	46	36.1	4.23095	3.00412	0.0013292	0.0158401	0.671419	2309.55	3439.8	2851.25	2477.85	2821.35	2328.78	2088.02	2086.07	1975.28	1847.82	4042.08	3619.01	4396.37	4791.93	2647.53	3402.35	2088.15	3214.05	3139.28	3363.15	3133.96
Sphinganine 1-phosphate	-1.23198	C01120	blue	rno00600|rno04080	Sphingolipid metabolism|Neuroactive ligand-receptor interaction	10.21_380.2559m/z	380.256	10.2107	neg	HMDB0001383	Lipids and lipid-like molecules	Sphingolipids	Phosphosphingolipids	M-H	C18H40NO5P	39.6	4.36	-3.27501	2.07618	0.00378792	0.0290415	0.425734	443.812	1042.46	456.745	245.45	695.87	446.881	399.635	393.946	486.533	425.435	336.249	459.982	669.113	893.105	988.936	1351.13	1060.15	1440.59	830.857	2024.77	1412.22
Sphingosine-1-phosphate	-0.764403	C06124	blue	rno00600|rno04071|rno04666|rno04371|rno05152|rno04020|rno04080|rno04072	Sphingolipid metabolism|Sphingolipid signaling pathway|Fc gamma R-mediated phagocytosis|Apelin signaling pathway|Tuberculosis|Calcium signaling pathway|Neuroactive ligand-receptor interaction|Phospholipase D signaling pathway	10.49_379.2486n	380.256	10.4926	pos	3891	Lipids and lipid-like molecules	Sphingolipids	Phosphosphingolipids	M+H, M+Na, M+H-H2O	C18H38NO5P	53.6	79	-0.514135	3.12242	0.0104637	0.0522969	0.588697	2136.95	3629.97	2193.4	1454.28	2384.3	2512.44	2156.21	2552.32	1966	1876.69	1716.58	1788.31	2477.59	2887.17	3138.41	4607.35	3854.31	5192.24	3688.97	6322.5	4256.25
PE-Cer(d16:1(4E)/24:0(2OH))	-2.92365					9.52_799.5693m/z	799.569	9.51915	pos	LMSP03020086	Lipids and lipid-like molecules	Sphingolipids	Phosphosphingolipids	M+K	C42H85N2O7P	41	27.1	-4.31669	2.42392	0.0453681	0.130942	0.131793	166.914	1266.49	302.329	207.846	485.723	180.52	32.0877	70.4296	36.7406	19.6397	232.751	205.26	865.148	159.434	2389.81	542.677	4838.26	14.6081	1277.02	1431.67	1974.72
PI-Cer(d20:0/16:0)	0.90604					11.87_809.5780n	832.578	11.8717	pos	LMSP03030024	Lipids and lipid-like molecules	Sphingolipids	Phosphosphingolipids	M+H-H2O, M+Na	C42H84NO11P	37.8	6.78	-0.289157	1.52888	0.000256581	0.00576671	1.8739	574.457	306.558	314.148	456.994	417.605	571.908	634.776	855.519	624.028	720.682	240.544	367.709	229.417	393.182	354.625	296.786	277.04	435.977	322.435	214.559	239.862
Nefazodone	-0.731045	C07256	blue			13.97_508.1855m/z	508.185	13.9719	pos	HMDB0015280	Organoheterocyclic compounds	Diazinanes	Piperazines	M+K	C25H32ClN5O2	36.4	0.226	-4.51042	1.10522	0.0180275	0.0724618	0.602467	304.932	506.139	82.4271	416.797	368.071	367.835	296.445	417.655	345.86	144.368	623.641	791.592	579.534	155.082	650.213	623.669	311.006	534.241	598.925	336.97	362.658
di-trans,poly-cis-undecaprenyl diphosphate	-1.58742	C04574	blue	rno00900	Terpenoid backbone biosynthesis	11.76_949.6215m/z	949.622	11.7612	pos	LMPR03030008	Lipids and lipid-like molecules	Prenol lipids	Polyprenols	M+Na	C55H92O7P2	33.4	0	0.520993	1.02825	0.00508756	0.0341435	0.332767	72.2441	217.101	163.101	74.2143	110.66	88.9254	57.0742	50.136	17.7925	16.0497	46.0251	72.9119	255.684	162.409	197.532	226.412	349.229	191.263	199.105	480.708	206.836
alpha-Tocopherol succinate	0.419199					15.36_531.4051m/z	531.405	15.36	pos	HMDB0033685	Lipids and lipid-like molecules	Prenol lipids	Quinone and hydroquinone lipids	M+H	C33H54O5	40.8	15.9	1.23989	1.31308	0.000771193	0.0115106	1.33719	843.889	631.094	898.316	741.184	756.34	882.342	866.449	877.322	876.03	853.129	881.468	798.796	553.894	789.548	539.96	525.108	497.913	555.701	704.262	593.208	502.171
Ubiquinone-4	-5.64217					12.03_926.6491m/z	926.649	12.0345	pos	HMDB0006710	Lipids and lipid-like molecules	Prenol lipids	Quinone and hydroquinone lipids	2M+NH4	C29H42O4	36.2	2.85	-1.51472	1.76668	0.000815273	0.0118603	0.0200234	7.66612	382.858	1.21358e-08	45.5089	15.8201	1.21358e-08	1.21358e-08	1.21358e-08	1.21358e-08	1.21358e-08	122.89	158.919	436.135	299.134	382.578	36.9191	697.552	232.536	773.439	762.182	309.159
1alpha,25-dihydroxy-24a-homo-22-thiavitamin D3	-2.29456					13.49_466.3342m/z	466.334	13.4853	pos	LMST03020263	Lipids and lipid-like molecules	Sterol Lipids	Secosteroids	M+NH4	C27H44O3S	43.2	47.9	-1.56795	2.45956	5.06233e-05	0.00194007	0.20383	171.136	839.602	450.579	513.749	75.393	27.172	18.762	256.767	26.6684	1.21358e-08	979.437	613.17	671.062	618.802	470.29	760.571	930.808	734.583	1030.34	1592.18	834.374
(24R)-1alpha,24-dihydroxy-22-oxavitamin D3	0.29215					16.07_436.3405m/z	436.341	16.0726	pos	LMST03020056	Lipids and lipid-like molecules	Sterol Lipids	Secosteroids	M+NH4	C26H42O4	41.3	22.4	-3.88164	1.15646	0.0299843	0.0999099	1.22446	1256.77	1026.39	1147.33	1084.53	958.417	1393.74	1454.62	1349.8	1191.34	1474.42	1329.89	1354.07	791.017	1075.96	832.123	990.888	838.965	920.578	1320.62	1065.61	770.545
1alpha,25-dihydroxy-11-(4-hydroxymethylphenyl)-9,11-didehydrovitamin D3	0.479131					11.52_559.3196m/z	559.32	11.5172	pos	LMST03020535	Lipids and lipid-like molecules	Sterol Lipids	Secosteroids	M+K	C34H48O4	35.5	3	2.22521	1.15745	0.00484347	0.0333784	1.3939	634.966	455.531	611.412	472.179	405.817	679.898	599.16	640.28	796.185	874.799	384.654	335.596	347.662	359.835	507.205	560.256	542.047	458.2	511.097	560.196	444.093
Valerenic acid	0.691441	C09743	red			11.40_233.1546m/z	233.155	11.4031	neg	HMDB0030016	Lipids and lipid-like molecules	Prenol lipids	Sesquiterpenoids	M-H	C15H22O2	38.8	5.39	-0.324133	1.68933	7.87597e-05	0.00258358	1.6149	811.43	502.466	848.711	792.895	845.009	674.59	724.188	852.432	870.886	882.725	645.713	782.294	510.67	746.99	440.669	439.617	401.369	454.91	414.279	403.828	286.782
S-Japonin	-1.03583					14.35_381.1731m/z	381.173	14.3529	neg	HMDB0035802	Lipids and lipid-like molecules	Prenol lipids	Sesquiterpenoids	M+FA-H	C19H28O3S	40.6	12	-3.00071	1.48285	0.00681393	0.0406008	0.487734	297.079	609.101	201.241	179.228	227.344	324.157	374.174	401.557	405.809	263.125	232.679	281.264	676.883	678.239	473.187	993.553	895.668	521.524	511.83	1036.09	399.196
(alpha-keto-dimethyl-delta-N,N-Dimethylguanidynol) valeric acid	-0.673896					1.82_201.1108n	403.229	1.82463	pos	HMDB0240212	Organic acids and derivatives	Keto acids and derivatives	Short-chain keto acids and derivatives	2M+H, 2M+K, M+H	C8H15N3O3	41	12.9	-2.71496	1.02918	0.0150816	0.0647273	0.626812	259.06	413.298	230.975	248.714	328.47	365.416	396.568	296.681	105.536	100.121	220.577	277.223	321.043	390.159	426.658	305.345	588.901	438.518	405.646	551.416	620.794
Taurochenodeoxycholic acid	-2.22919	C05465	blue	rno00120|rno04976|rno04979	Primary bile acid biosynthesis|Bile secretion|Cholesterol metabolism	8.81_499.2954n	500.303	8.81003	pos	LMST05040005	Lipids and lipid-like molecules	Sterol Lipids	Steroid conjugates	M+H, M+NH4, M+H-H2O	C26H45NO6S	44.1	34.2	-2.75359	1.117	0.0306086	0.101384	0.213279	62.3808	292.485	6.74454	5.53782	26.098	84.1293	51.0969	91.7612	168.36	65.3184	211.746	32.4333	155.842	211.987	151.766	852.933	171.761	795.113	162.63	288.652	182.467
Taurodeoxycholic acid	-1.62063	C05463	blue			8.56_499.2946n	482.291	8.56472	pos	LMST05040013	Lipids and lipid-like molecules	Sterol Lipids	Steroid conjugates	M+H-H2O, M+NH4	C26H45NO6S	49.3	60.1	-4.36109	1.09347	0.000438064	0.00799251	0.325193	67.4311	207.357	33.8297	30.5272	86.4982	83.2468	64.5723	75.285	99.0688	66.421	100.085	136.279	347.628	312.895	169.322	212.552	123.392	335.809	219.466	143.159	180.345
Sulfoglycolithocholic acid	-2.48779					6.48_512.2686m/z	512.269	6.48423	neg	LMST05030015	Lipids and lipid-like molecules	Sterol Lipids	Steroid conjugates	M-H	C26H43NO7S	34.7	1.82	-0.307421	12.0136	0.000795894	0.0117055	0.178279	3798.39	21305.9	3907.96	2388.81	6687.43	6543.24	3462.45	3475.55	2602.2	1319.5	9942.49	7808.83	25073.1	18356.7	44473.8	9698.36	36035.2	23997.3	28401.8	9033.83	21543.5
Physalolactone B	-2.15881					9.48_500.3122n	499.305	9.47805	neg	HMDB0034200	Lipids and lipid-like molecules	Steroids and steroid derivatives	Steroid lactones	M-H, M+FA-H	C30H44O6	40.6	14.3	-3.13575	1.60094	0.0489272	0.137288	0.223941	148.257	662.038	612.563	123.386	222.417	79.4414	25.2743	46.4786	52.7238	23.7747	71.4271	20.7445	252.325	9.26901	897.769	1041.33	1724.3	77.0976	487.767	936.628	1763.76
Cholic acid glucuronide	-3.90001					7.79_565.3000m/z	565.3	7.78698	neg	HMDB0002577	Lipids and lipid-like molecules	Steroids and steroid derivatives	Steroidal glycosides	M-H2O-H	C30H48O11	45.7	39.2	-3.05484	2.41899	0.0280501	0.0957532	0.0669852	71.9263	1073.77	171.562	90.7832	99.4526	92.69	44.4063	31.1473	17.2058	28.1636	71.3117	108.042	807.038	80.962	3439.04	178.372	1424.86	77.8398	1568.57	1280.95	2774.43
beta-Chacotriosyllilagen	1.19319					8.13_884.4729n	865.455	8.12863	neg	HMDB0035491	Lipids and lipid-like molecules	Steroids and steroid derivatives	Steroidal glycosides	M-H2O-H, M-H	C45H72O17	35.4	12.9	-4.61868	1.16142	0.00807619	0.0449879	2.28657	343.349	150.159	305.691	204.215	161.748	636.625	302.334	414.732	213.062	508.389	167.323	98.0468	41.1823	222.908	152.551	282.464	89.5046	414.169	57.6609	38.4309	87.511
estrane-3alpha,17alpha-diol	-1.22027					11.75_301.2145m/z	301.215	11.7477	pos	LMST02010019	Lipids and lipid-like molecules	Sterol Lipids	Steroids	M+Na	C18H30O2	46.1	38.5	2.6806	1.15265	0.0347378	0.109957	0.429202	169.653	395.275	118.458	205.939	51.7149	484.669	271.026	173.192	44.2294	7.99458	150.392	59.0314	208.047	137.757	292.051	698.798	688.455	529.153	383.852	715.561	484.932
Cucurbitacin S	-1.5596	C08806	blue			11.49_497.2917m/z	497.292	11.4851	neg	LMST01010116	Lipids and lipid-like molecules	Sterol Lipids	Sterols	M-H	C30H42O6	39.9	13.5	1.76392	1.24965	0.0132963	0.0602166	0.339245	122.259	360.385	153.041	124.999	5.41548	128.501	66.136	75.0216	145.699	279.258	154.966	186.125	589.496	407.415	380.666	141.776	923.942	239.553	386.854	369.407	184.04
Proscillaridin A	-2.88284					9.90_511.2715m/z	511.271	9.89753	neg	LMST01130008	Lipids and lipid-like molecules	Sterol Lipids	Sterols	M-H2O-H	C30H42O8	34	2.48	2.58337	1.2399	0.000575153	0.00948884	0.135575	28.8352	212.689	51.4351	54.2243	42.0869	15.5435	30.4905	18.7726	8.12449	10.0042	143.733	334.981	231.068	332.837	381.313	51.2531	362.793	91.0979	183.186	124.006	103.307
Sambutoxin	-2.25777					7.16_498.2877m/z	498.288	7.15537	neg	HMDB0041085	Lipids and lipid-like molecules	Prenol lipids	Terpene glycosides	M+FA-H	C28H39NO4	38.8	2.22	3.58971	5.34759	8.80193e-05	0.00283827	0.209095	855.898	4093.34	858.972	691.552	1621.48	603.739	885.205	179.726	1273.36	733.152	3047.8	748.06	4941.35	2450.63	4683.7	7171.33	3675.26	5417.66	4246.32	3147.44	5497.21
15-Hydroxyleptocarpin	0.909838					4.82_755.3286m/z	755.329	4.82078	neg	HMDB0036694	Lipids and lipid-like molecules	Prenol lipids	Terpene lactones	2M-H	C20H26O7	41.9	17.8	0.247303	6.5587	0.00118194	0.0149729	1.87883	10891.3	5796.86	6365.01	8059.33	10695.2	13290.6	6277.1	15944.7	12146.4	14352.5	6418.56	6983.52	7578.73	7966.6	3249.14	5317.69	3345.24	5363.3	6562.75	2563.85	8416.09
Flupoxam	0.936134	C18543	red			0.67_460.0734n	499.032	0.671533	pos	HMDB0041341	Organoheterocyclic compounds	Azoles	Triazoles	M+H-H2O, M+K	C19H14ClF5N4O2	33	0.417	1.82584	1.06329	0.00199857	0.0201474	1.91339	318.973	166.705	230.631	368.398	271.79	309.599	319.08	414.494	388.689	249.103	275.883	375.992	284.331	192.927	140.487	115.358	58.9124	77.396	123.93	108.524	80.0177
TG(22:5(7Z,10Z,13Z,16Z,19Z)/20:5(5Z,8Z,11Z,14Z,17Z)/22:6(4Z,7Z,10Z,13Z,16Z,19Z))	-6.11738					9.74_981.7352m/z	981.735	9.74232	pos	HMDB0010553	Lipids and lipid-like molecules	Glycerolipids	Triradylcglycerols	M+H-H2O	C67H98O6	36.7	1.35	2.17955	1.59838	0.0246681	0.0879651	0.014404	6.29401	436.961	12.6095	6.53684	30.1045	1.21358e-08	1.10119	1.21358e-08	1.21358e-08	1.21358e-08	12.8918	1.21358e-08	275.424	1.21358e-08	879.635	224.222	1447.85	1.21358e-08	296.285	724.099	946.159
beta-Citraurin	-1.69853					8.51_432.3039n	450.32	8.50938	pos	HMDB0035091	Lipids and lipid-like molecules	Prenol lipids	Triterpenoids	M+H, M+NH4, M+H-H2O	C30H40O2	43	29	2.43407	1.59445	0.0303929	0.100864	0.308101	192.255	623.999	139.434	157.653	23.9025	241.959	112.252	3.7341	274.55	584.553	696.83	175.609	1764.43	278.334	197.586	899.841	310.542	293.728	430.995	1135.97	680.124
Theasapogenol E	-2.54228					9.51_485.3249m/z	485.325	9.50505	neg	HMDB0034518	Lipids and lipid-like molecules	Prenol lipids	Triterpenoids	M-H2O-H	C30H48O6	40.4	15.3	-4.5747	1.26222	0.0453506	0.130938	0.171672	62.9208	366.518	297.02	120.664	53.758	10.9967	1.21358e-08	1.30827	8.85639	10.7625	0.565774	1.21358e-08	101.384	1.21358e-08	976.375	322.249	741.894	1.21358e-08	330.518	686.98	871.733
Lucidenic acid F	-2.08467					9.30_455.2457m/z	455.246	9.3019	neg	HMDB0036436	Lipids and lipid-like molecules	Prenol lipids	Triterpenoids	M-H	C27H36O6	37.2	0.00123	3.91403	1.05899	0.0411376	0.122332	0.23575	63.4174	269.003	156.905	61.8016	55.3764	38.1753	28.2776	12.7261	42.3445	111.732	48.1738	52.3295	312.453	70.8255	639.85	61.0093	371.523	25.1404	211.823	386.071	779.833
LysoPC(20:4(8Z,11Z,14Z,17Z))	0.65903	C04230	red	rno05231|rno00564	Choline metabolism in cancer|Glycerophospholipid metabolism	10.92_588.3305m/z	588.331	10.9206	neg	HMDB0010396	Unclassified	Unclassified	Unclassified	M+FA-H	C28H50NO7P	55.1	76.6	-0.336444	12.361	2.3098e-07	5.20917e-05	1.57902	39471.4	24997.4	36398.6	34376.1	45338.6	32307.1	37011.6	41961.5	46792.2	41585.3	26834.5	26077.4	26699.3	24875.9	20052.6	27028.6	24922.2	27665.9	23830.4	24025.7	22958.6
LysoPC(22:5(4Z,7Z,10Z,13Z,16Z))	0.600559	C04230	red	rno05231|rno00564	Choline metabolism in cancer|Glycerophospholipid metabolism	11.21_614.3451m/z	614.345	11.2065	neg	HMDB0010402	Unclassified	Unclassified	Unclassified	M+FA-H	C30H52NO7P	51.4	61.6	-2.14909	2.12332	0.0273948	0.0943695	1.5163	2271.35	1497.95	3864.5	2322.95	3499.15	1667.75	1540.26	1954.55	1783.99	1537.62	1381.38	985.839	2661.46	1561.97	1391.34	1275.5	1217.83	1295.55	1762.87	1907.46	1036.26
LysoPC(20:4(5Z,8Z,11Z,14Z))	0.681631	C04230	red	rno05231|rno00564	Choline metabolism in cancer|Glycerophospholipid metabolism	11.34_543.3312n	544.339	11.3409	pos	61705	Unclassified	Unclassified	Unclassified	M+H, M+K, M+Na	C28H50NO7P	49.9	55.3	-2.28343	7.82102	1.31209e-05	0.000775677	1.60395	16826.5	10490.6	20266.2	13262.3	17549.5	15977.9	16148.7	19645.4	16555	15206.9	8084.46	6954.19	11484.9	8476.91	8577.24	13024.1	12072.9	11534	11944.1	13612.9	9631.36
PC(16:1(9Z)/16:0)	0.894265	C00157	red	rno00591|rno05231|rno00564|rno04723|rno00592|rno00590	Linoleic acid metabolism|Choline metabolism in cancer|Glycerophospholipid metabolism|Retrograde endocannabinoid signaling|alpha-Linolenic acid metabolism|Arachidonic acid metabolism	14.12_732.5528m/z	732.553	14.1151	pos	59449	Unclassified	Unclassified	Unclassified	M+H	C40H78NO8P	36.7	1.28	-1.29618	2.16457	0.00506597	0.0340852	1.85866	1491.06	802.22	413.21	1453.56	988.107	1855.74	1679.58	2142.18	1674.71	1721.36	219.41	688.172	767.903	1241.32	764.162	883.109	655.295	917.355	1461.84	1071.07	154.782
PC(16:1(9Z)/20:3(5Z,8Z,11Z))	0.769934	C00157	red	rno00591|rno05231|rno00564|rno04723|rno00592|rno00590	Linoleic acid metabolism|Choline metabolism in cancer|Glycerophospholipid metabolism|Retrograde endocannabinoid signaling|alpha-Linolenic acid metabolism|Arachidonic acid metabolism	11.90_782.5677m/z	782.568	11.8994	pos	HMDB0008013	Unclassified	Unclassified	Unclassified	M+H	C44H80NO8P	40.7	18.9	-2.20031	7.15407	0.0114756	0.0552662	1.70519	20693	12135.3	3807.07	20333.6	16802.5	18116.2	31409.2	26481.4	25911.7	22682.1	5909.62	14221.5	13019.8	16716.1	9937.34	12877.6	9607.08	12325.5	18825.9	17145.7	2902
PC(16:0/20:4(8Z,11Z,14Z,17Z))	0.890554	C00157	red	rno00591|rno05231|rno00564|rno04723|rno00592|rno00590	Linoleic acid metabolism|Choline metabolism in cancer|Glycerophospholipid metabolism|Retrograde endocannabinoid signaling|alpha-Linolenic acid metabolism|Arachidonic acid metabolism	14.29_804.5491m/z	804.549	14.2902	pos	HMDB0007983	Unclassified	Unclassified	Unclassified	M+Na	C44H80NO8P	44.4	38.5	-2.85155	2.36908	0.0164102	0.0680561	1.85389	2014.07	1086.4	943.898	1395.86	984.808	2703.49	2533.43	2512.93	2211.86	2826.27	193.372	822.833	961.232	1130.5	1001.77	771.799	1305.39	2407.98	2345.9	844.77	164.892
PC(20:3(8Z,11Z,14Z)/18:1(11Z))	0.901306	C00157	red	rno00591|rno05231|rno00564|rno04723|rno00592|rno00590	Linoleic acid metabolism|Choline metabolism in cancer|Glycerophospholipid metabolism|Retrograde endocannabinoid signaling|alpha-Linolenic acid metabolism|Arachidonic acid metabolism	17.16_854.5894m/z	854.589	17.1582	neg	HMDB0008400	Unclassified	Unclassified	Unclassified	M+FA-H	C46H84NO8P	47.5	65	-2.73959	1.30869	0.00201754	0.0201922	1.86776	454.758	243.478	539.013	572.089	330.715	138.779	385.562	362.653	680.537	628.711	291.297	349.352	222.176	141.908	163.094	279.994	245.591	285.488	246.134	228.615	224.61
Hordatine A	-3.28471	C08307	blue			8.07_565.2892m/z	565.289	8.07415	neg	HMDB0030461	Phenylpropanoids and polyketides	2-arylbenzofuran flavonoids	Unclassified	M-H	C28H38N8O5	37.4	0	-0.00310759	1.46721	0.00777251	0.043862	0.102613	36.0826	351.638	65.7305	25.7756	55.0359	23.5502	30.3028	22.4239	40.5692	25.273	62.0695	72.5311	481.91	115.383	429.214	159.352	386.097	113.132	592.355	425.642	1030.33
Benzofuran	-0.570025	C14512	blue			1.80_118.0413n	136.075	1.7973	pos	HMDB0032929	Organoheterocyclic compounds	Benzofurans	Unclassified	M+H, M+NH4	C8H6O	44.1	26.9	-4.73056	2.14708	2.87224e-05	0.0013426	0.673605	1010.89	1500.72	1086.51	834.237	1065.56	1263.6	968.501	1049.07	957.602	862.079	1457.99	1255.17	1539.67	1643.47	1403.08	1560.25	1167.32	1520.73	1886.25	1760.11	1313.91
THTC	-0.870789	C11074	blue			1.27_132.0239n	150.058	1.269	pos	68817	Unclassified	Unclassified	Unclassified	M+H, M+NH4	C5H8O2S	50.7	60.7	-4.92429	2.78783	3.22035e-06	0.000315751	0.546848	927.001	1695.17	863.749	838.641	990.594	1225.06	978.825	923.694	885.621	709.826	1668.07	1055.93	1600.65	1697.36	1986.11	1740.64	1438.12	1821.9	1747.44	2209.74	1680.93
1-arachidonoyl-2-hydroxy-sn-glycero-3-phosphate	0.461628					11.87_457.2344m/z	457.234	11.8667	neg	265064	Unclassified	Unclassified	Unclassified	M-H	C23H39O7P	47.8	47.6	-3.52954	2.15208	0.0169659	0.0696424	1.3771	2974.74	2160.15	3004.25	3012.15	3074.7	3428.22	3307.38	3129.76	2473.76	2367.68	2351.26	2397.21	2498	4045.19	1026.34	1879.34	2006.64	2680.46	1784.97	1841.12	1251.15
PE(18:0/0:0)	-1.53174					13.06_481.3157n	482.323	13.0641	pos	40775	Unclassified	Unclassified	Unclassified	M+H, 2M+H, M+Na, M+H-H2O	C23H48NO7P	48.6	48.6	-2.34079	6.81188	0.000278616	0.00604335	0.34586	2823.58	8163.92	4410.27	2963.39	4197.41	2814.69	1863.23	3182.06	1944.45	1213.09	4238.73	5863.98	8290.84	8962.66	7731.02	7214.49	10702.2	6312.97	7123.62	16213.5	7149.11
PC(14:0/O-1:0)	-0.876674					11.31_481.3165n	482.324	11.3135	pos	76586	Unclassified	Unclassified	Unclassified	M+H, 2M+H, M+H-H2O	C23H48NO7P	44.8	27.9	-0.736313	6.01514	0.00372567	0.0288395	0.544622	5824.02	10693.7	10772.1	5599.76	6587.85	6962.27	5104.87	4139.11	4421.28	3004.97	7015.08	7124.04	15072.5	7095.99	7416.74	10620.4	13065.3	10001.9	16932.6	13863.2	9422.91
3beta-Hydroxychola-5,16-dien-24-oic Acid	-2.4743					8.48_373.2731m/z	373.273	8.48157	pos	43009	Unclassified	Unclassified	Unclassified	M+H	C24H36O3	53.4	71.2	-1.71701	4.03955	0.0495908	0.138184	0.179954	685.91	3811.59	1957.84	981.087	902.279	573.771	305.597	451.571	158.279	156.857	427.741	321.03	2059.06	381.403	7137.16	1067.83	10546.8	705.157	2923.41	5130.16	11227.8
Pregnan-20-one, 17-(acetyloxy)-3-hydroxy-6-methyl-, (3b,5b,6a)-	-2.97468					10.02_390.2765n	391.284	10.0168	pos	1089	Unclassified	Unclassified	Unclassified	M+H, 2M+Na, M+Na	C24H38O4	54.9	79.9	-1.38068	4.60028	0.0108282	0.0534102	0.127213	472.109	3711.17	769.043	499.082	390.853	384.698	481.57	244.628	389.694	617.306	753.018	644.509	3898.35	630.738	3843.28	4862.58	11124.8	404.247	4668.06	5897.36	4095.85
Bis(2-ethylhexyl) phthalate	0.466905					16.07_390.2764n	391.284	16.0726	pos	263643	Unclassified	Unclassified	Unclassified	M+H, 2M+NH4, 2M+Na, M+NH4, M+Na	C24H38O4	50.4	58.3	-1.46658	4.25935	0.000476473	0.00837829	1.38214	7832.35	5666.82	7148.29	6935.96	6071.4	8603.15	8636.24	8473.9	7495.89	9293.94	6809.75	7270.83	4363.49	5863.15	4886.87	5299.23	4874.02	5161.48	7039.37	6463.09	4303.74
PC(14:0/0:0)	-0.805181					10.68_467.3006n	468.308	10.6839	pos	40278	Unclassified	Unclassified	Unclassified	M+H, 2M+Na, 2M+H, M+Na, M+H-H2O	C22H46NO7P	43.4	19	-1.34551	3.91852	0.0485579	0.136725	0.57229	3712.61	6487.29	5599.94	2308.08	5008.85	5637.83	3155.51	2407.4	2964.14	2619.14	2199.94	2504.85	7231.71	3186.62	6443.38	6126.77	7946.18	7521.29	9553.19	14069.7	4576.49
Glycerophospho-N-Arachidonoyl Ethanolamine	-1.4089					11.40_502.2919m/z	502.292	11.395	pos	45331	Unclassified	Unclassified	Unclassified	M+H	C25H44NO7P	45.8	40.9	-1.89795	3.90799	0.000225411	0.00532533	0.3766	1056.46	2805.27	1502.12	1129.21	1390.24	981.672	603.687	1201.41	1070.81	572.559	1358.26	1621.53	3671.56	2306.12	2471.02	2698.12	3662.91	2183.87	3009.66	4930.38	2944.53
Palmitoyl-L-carnitine	-1.18775					11.67_399.3341n	400.341	11.6654	pos	961	Unclassified	Unclassified	Unclassified	M+H, M+Na	C23H45NO4	49.8	54.4	-1.85604	3.53218	0.0182095	0.072959	0.438986	1600.04	3644.87	1091.35	811.668	807.341	2341.85	2222.7	2403.72	1623.91	1497.8	1263.49	810.471	1187.67	1436.37	3633.13	5448.06	4876.86	5398.09	4649.18	6971.91	4418.28
Pregnan-20-one, 17-(acetyloxy)-3-hydroxy-6-methyl-, (3a,5b,6a)-	-1.45313					10.45_390.2756n	391.283	10.4516	pos	1090	Unclassified	Unclassified	Unclassified	M+H, 2M+NH4, 2M+Na, M+NH4, M+Na	C24H38O4	40.6	43.9	-3.61786	3.41645	0.0264881	0.0921128	0.365229	1140.86	3123.69	1400.37	1262.14	914.261	1498.93	1238.62	1083.12	790.154	939.279	1539.07	1587.21	3070.59	1496.61	2456.8	3240.7	9436.65	1509.72	3656.9	3980.88	2385.41
PE(18:1(9Z)/0:0)	-1.84766					12.13_479.2994n	480.307	12.1302	pos	40778	Unclassified	Unclassified	Unclassified	M+H, M+Na	C23H46NO7P	53.3	78.3	-3.64504	3.33655	3.66362e-05	0.00156569	0.277843	457.108	1645.2	810.384	561.492	700.533	362.341	277.798	441.879	313.135	189.302	945.276	1397.71	1926.2	1886.17	1298.52	1341.72	2110.85	1085.05	1623.9	3003.38	1478.45
7(S),17(S)-dihydroxy-8(E),10(Z),13(Z),15(E),19(Z)-Docosapentaenoic Acid	-1.14574					11.59_362.2450n	343.227	11.5944	neg	64758	Unclassified	Unclassified	Unclassified	M-H2O-H, M-H	C22H34O4	47.2	42.8	-1.96287	2.04935	0.00770329	0.0435997	0.451956	492.042	1088.69	457.759	729.311	347.206	668.596	766.473	470.178	318.813	177.999	757.978	494.999	955.051	681.375	659.223	1637.09	2268.2	1071.23	789.411	1449.95	1211.12
15-epi-PGA1	-2.15662					8.80_335.2215m/z	335.222	8.79827	neg	36120	Unclassified	Unclassified	Unclassified	M-H	C20H32O4	44.2	31.1	-3.71245	1.04486	0.0130083	0.0593345	0.224281	50.0032	222.949	52.7282	121.209	47.4913	45.5233	57.9483	64.0134	9.6316	1.48058	454.905	153.973	187.497	69.1425	121.578	367.122	589.573	167.714	71.3547	190.748	78.8273
Myristic Acid ethyl ester	-0.99589					14.19_256.2404n	255.233	14.1858	neg	45004	Unclassified	Unclassified	Unclassified	M-H, 2M-H	C16H32O2	54.7	79.7	0.840787	1.81325	0.00375946	0.0289502	0.501426	446.087	889.636	341.87	342.807	372.591	501.919	538.662	505.048	563.191	402.608	497.24	351.065	884.48	680.372	715.039	1288.92	1291.4	1200.76	829.75	1437.87	609.104
Triphenylphosphine oxide	0.318528					9.15_278.0865n	279.094	9.15118	pos	64889	Unclassified	Unclassified	Unclassified	M+H, 2M+H, 2M+Na, M+Na	C18H15OP	57	89.9	1.60056	2.08157	0.0133281	0.0602868	1.24706	3477.57	2788.62	2946.11	3288.37	3178.26	3752.4	3901.13	3755.59	3407.4	3591.3	3378.75	4090.72	2309.3	3428.34	2429.22	2524.68	2161.04	2653.81	3078.24	2701.64	1919.12
Aflatoxin ExB2	1.36881					6.54_358.1070n	376.141	6.54067	pos	HMDB0038805	Unclassified	Unclassified	Unclassified	M+H, M+NH4, M+H-H2O	C19H18O7	41.8	20.5	4.96832	1.03977	0.00699221	0.0412756	2.58257	278.249	107.741	267.254	285.715	169.396	546.714	406.556	441.46	48.5566	60.3412	169.041	108.466	74.7426	45.7409	72.0398	165.502	97.4677	83.6394	94.4269	145.756	128.33
Chrycorin	0.465811					1.12_201.0384m/z	201.038	1.1194	neg	HMDB0035149	Organoheterocyclic compounds	Oxanes	Unclassified	M-H2O-H	C12H12O2S	37.8	2.99	1.93915	1.8996	0.000355032	0.00700767	1.38109	1478.64	1070.63	1296.85	1348.96	1465.51	1275.21	1445.3	1752.96	1689.15	1555.15	1177.91	1424.51	820.955	1146.39	898.421	962.53	1165.89	1087.92	1377.28	907.525	807.565
Methyl diacetoxy-8-gingerdiol	-1.38335					12.14_422.2671n	440.311	12.1442	pos	263550	Unclassified	Unclassified	Unclassified	M+H-H2O, M+NH4	C24H38O6	42.6	18.7	0.669235	1.11214	0.00299537	0.0254755	0.383328	103.247	269.344	147.387	130.455	94.2033	122.566	88.5829	84.8715	96.6009	61.3103	163.392	138.083	186.198	190.407	203.307	274.085	564.976	229.39	223.354	455.724	333.866
p-CHLOROPHENYLALANINE	1.17203					5.43_199.0393n	182.036	5.43223	pos	44308	Unclassified	Unclassified	Unclassified	M+H-H2O, M+H	C9H10ClNO2	51.1	86.4	-3.3515	1.04097	0.0466136	0.13315	2.25328	332.878	147.73	216.978	140.693	150.107	333.892	384.774	225.159	253.008	958.414	130.392	122.259	26.9841	201.917	275.391	330.067	94.7963	202.25	124.924	58.9052	57.1501
3,16-DIDEOXYMEXICANOLIDE-3beta-DIOL	-2.40988					8.76_471.2395m/z	471.239	8.75727	neg	43636	Unclassified	Unclassified	Unclassified	M-H	C27H36O7	39.8	10.2	1.34728	1.12164	0.022635	0.0834284	0.188172	46.4077	246.624	94.6596	39.7685	20.5713	123.951	48.888	18.4974	6.43214	18.4937	66.9884	49.6705	432.928	66.8933	490.381	41.3692	631.317	10.0669	191.621	278.957	452.676
(±)12,13-DiHOME	-0.697055					9.98_313.2381m/z	313.238	9.97852	neg	45199	Unclassified	Unclassified	Unclassified	M-H	C18H34O4	53.4	71.1	-0.972499	1.42305	0.0138582	0.061743	0.61683	489.095	792.917	435.945	466.275	133.507	373.233	572.5	332.656	952.535	646.112	686.431	637.243	1281.71	1062.1	569.252	1048.89	698.608	695.695	765.539	743.702	532.918
24,25,26,27-Tetranor-23-oxo-hydroxyvitamin D3	-1.84238					8.28_403.2474m/z	403.247	8.27897	neg	HMDB0060114	Lipids and lipid-like molecules	Steroids and steroid derivatives	Vitamin D and derivatives	M+FA-H	C23H34O3	43.8	31.3	-4.33629	1.23182	0.0285961	0.0969823	0.278862	100.991	362.153	332.083	133.134	91.8821	73.377	29.7991	70.2374	37.3242	40.0882	63.074	99.7119	458.959	97.7514	770.923	112.892	816.591	30.5664	567.778	396.004	569.433

## Sheet: 说明
说明
绿色背景为富集到通路的差异代谢物
蓝色背景为有KEGG ID，但没有富集到通路的差异代谢物
无背景色为没有KEGG ID的差异代谢物
